# Supplementary material for: Novel 4-Methylumbelliferone Amide Derivatives: Synthesis, Characterization and Pesticidal Activities
Source: MDPI journal article supplement (doi:10.3390/molecules23010122), 2018-01-08
Supplement: s1 [file s1]

## Supplementary Materials

The  $^1\text{H}$ -NMR Spectra of Compounds **4aa-4bq**.

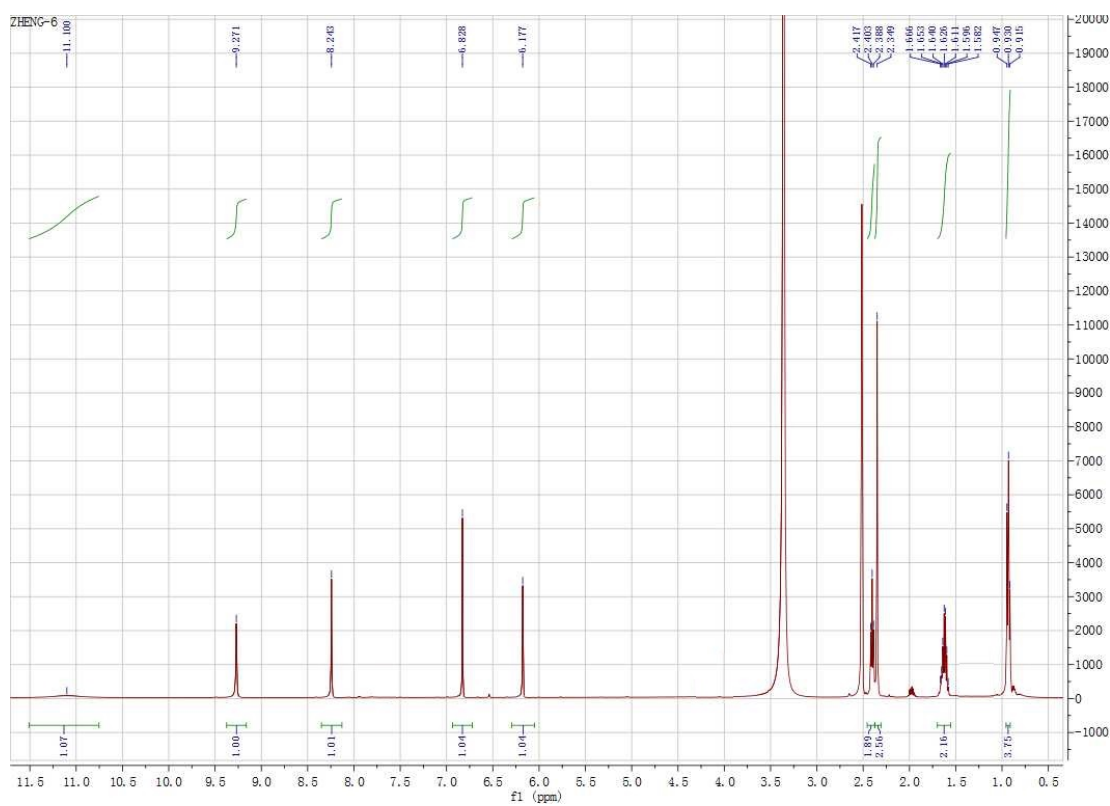

Figure S1.  $^1\text{H}$  NMR of **4aa**

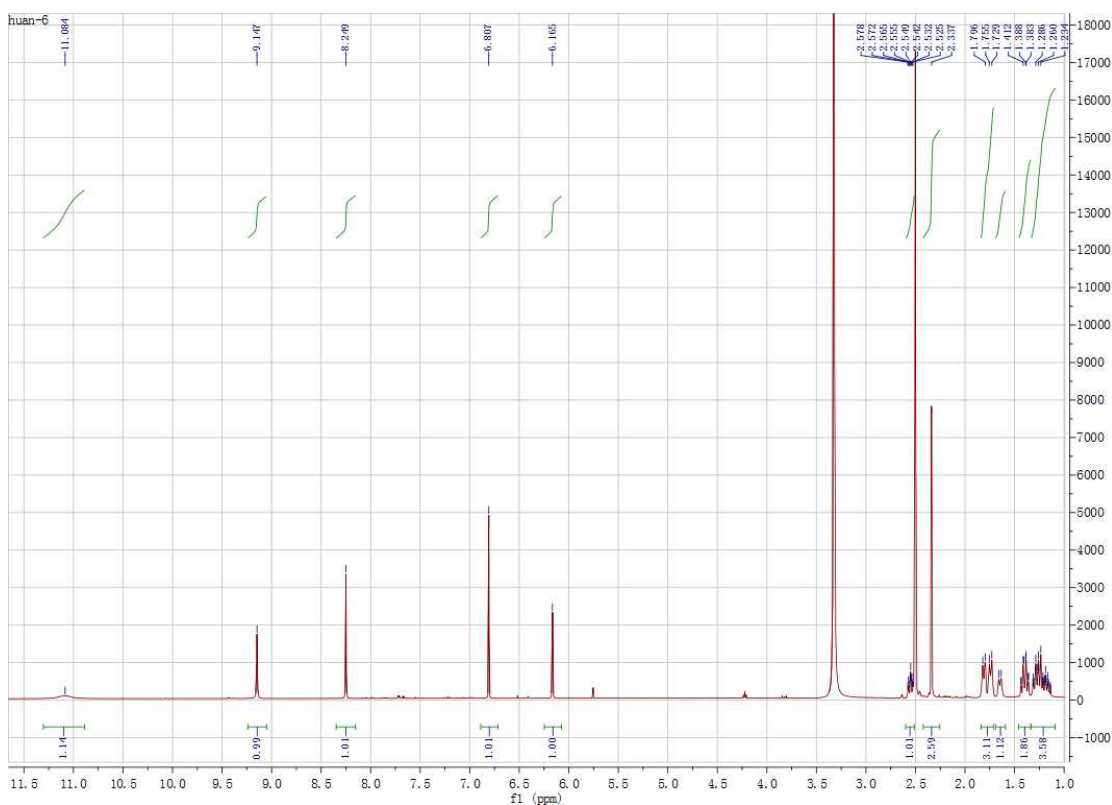

Figure S2.  $^1\text{H}$  NMR of **4ab**

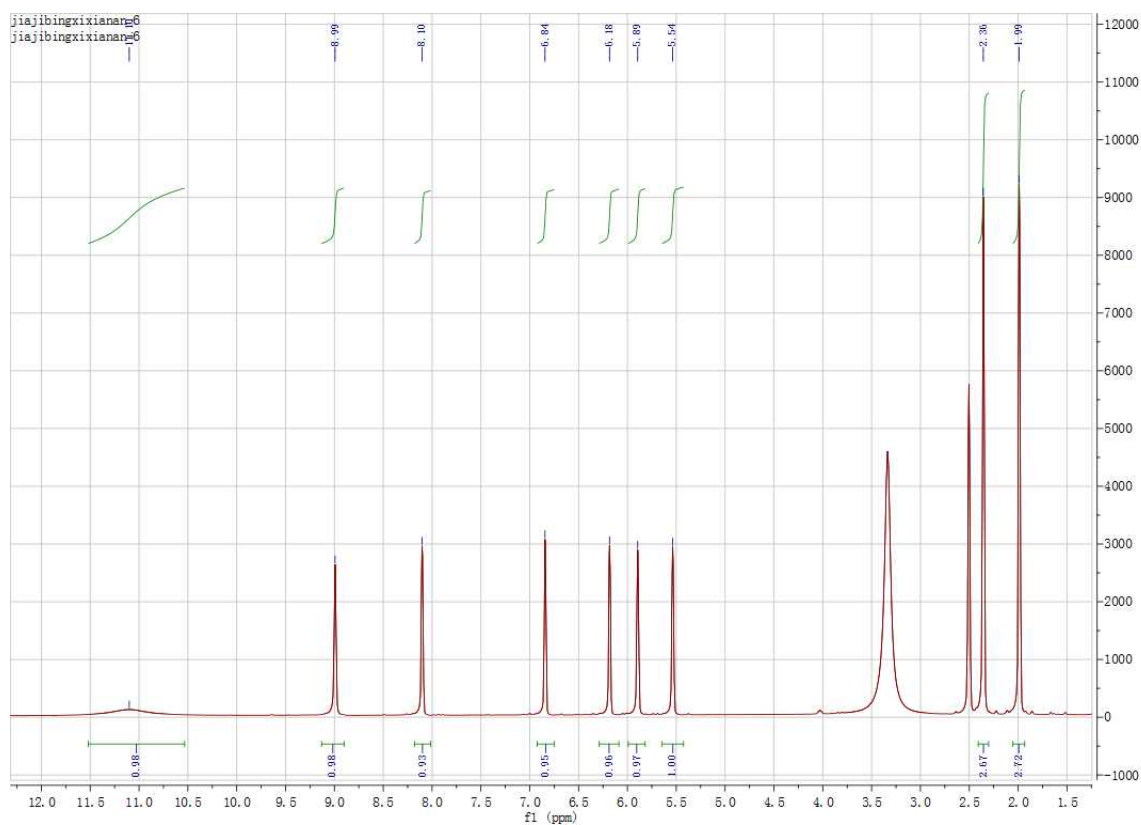

Figure S3.  $^1\text{H}$  NMR of 4ac

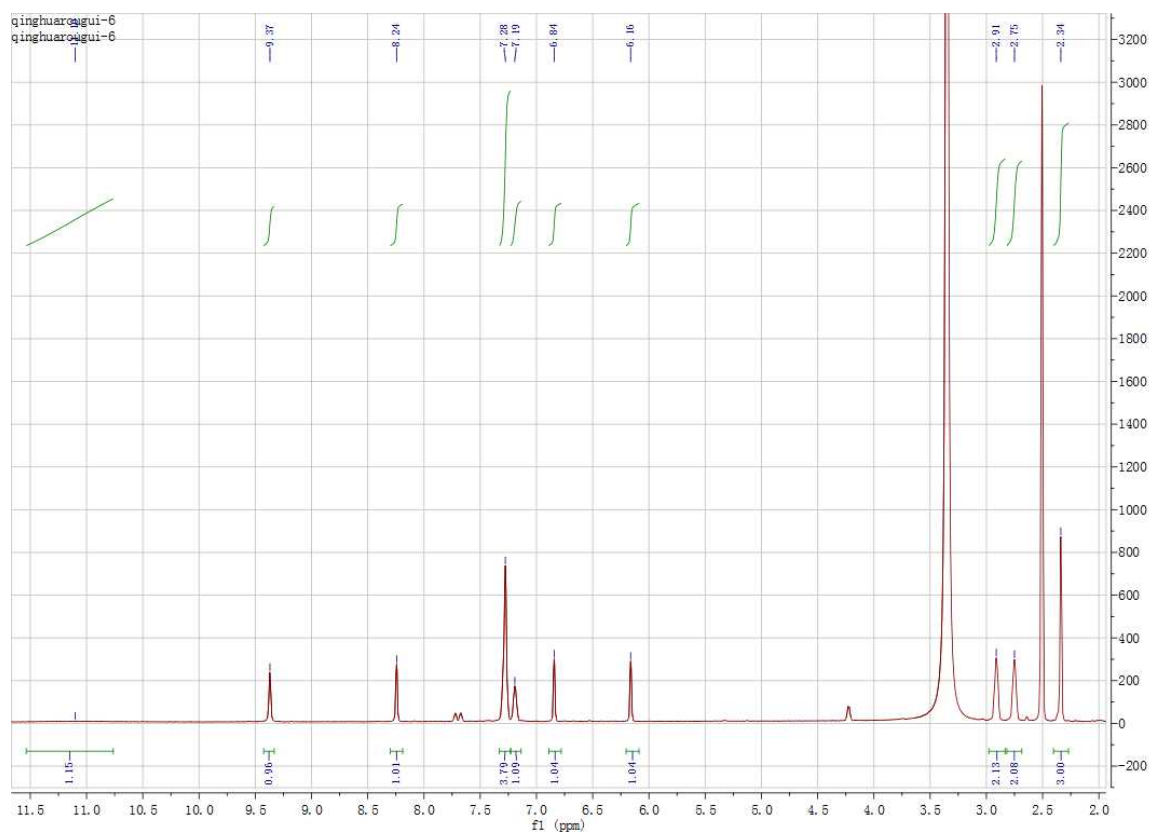

Figure S4.  $^1\text{H}$  NMR of 4ad

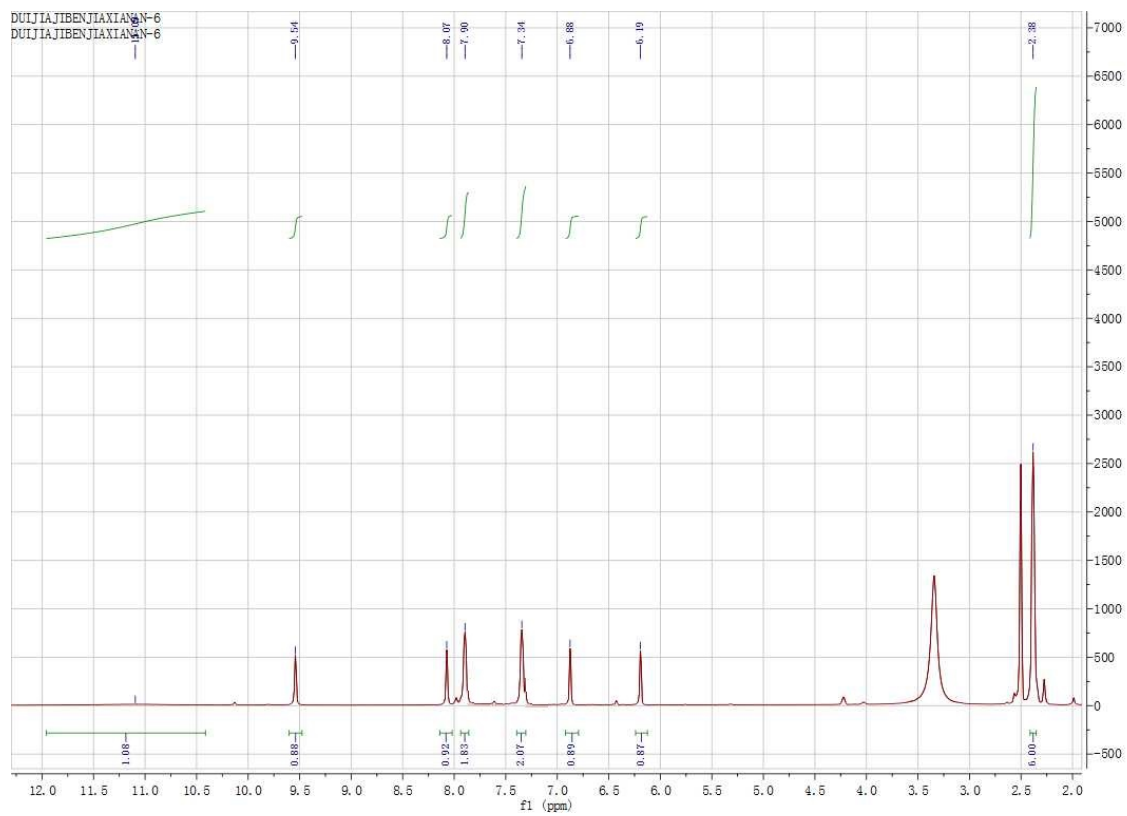

Figure S5. <sup>1</sup>H NMR of 4ae

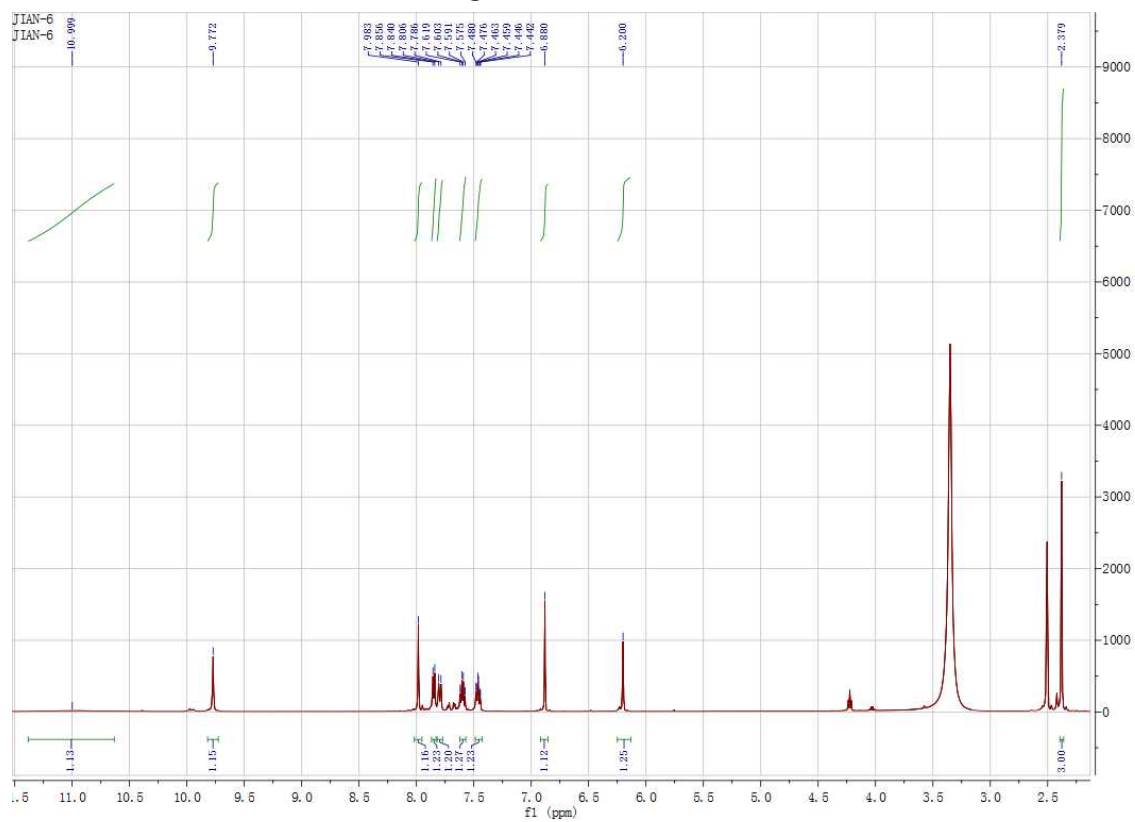

Figure S6. <sup>1</sup>H NMR of 4af

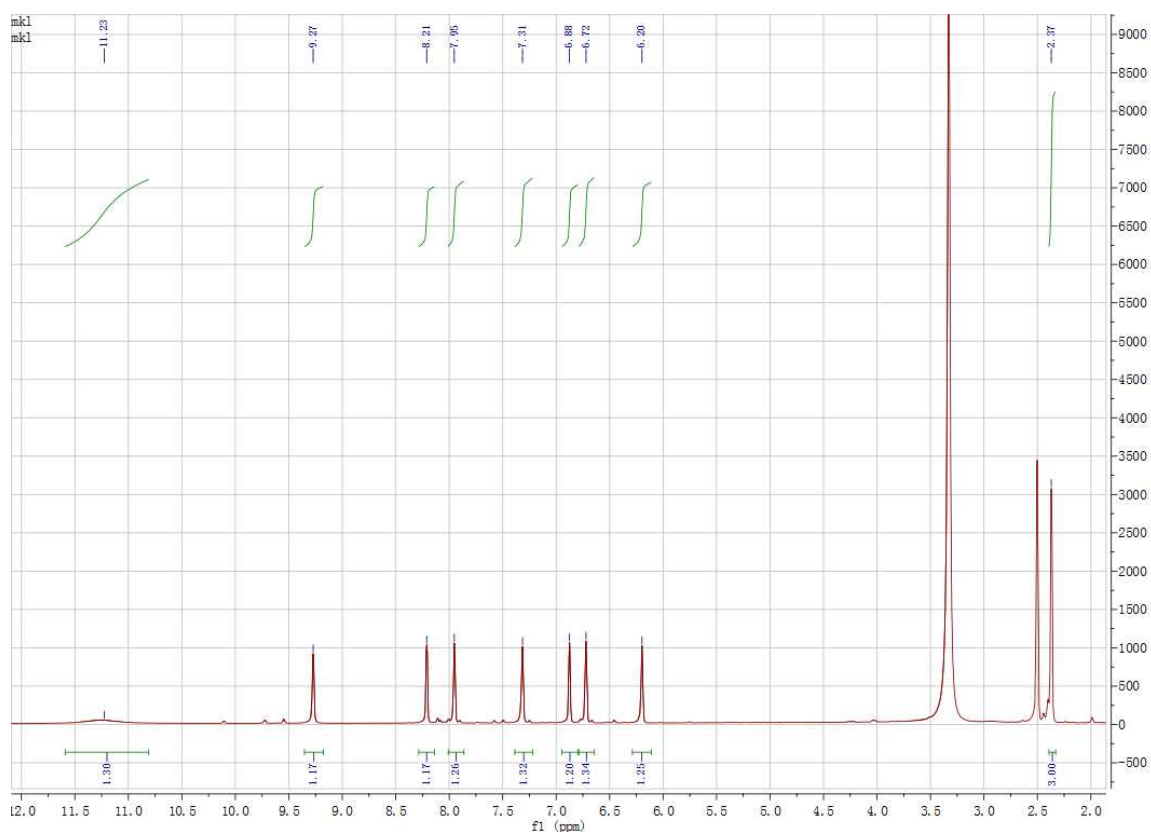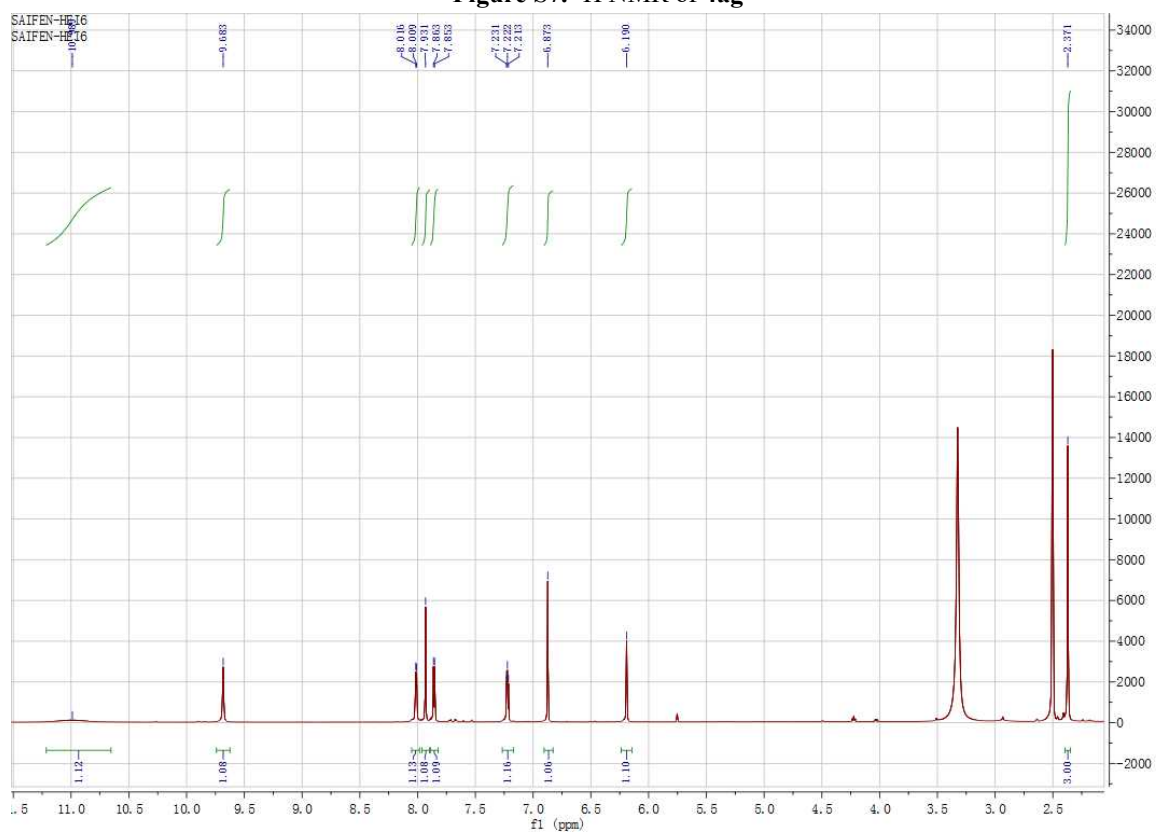

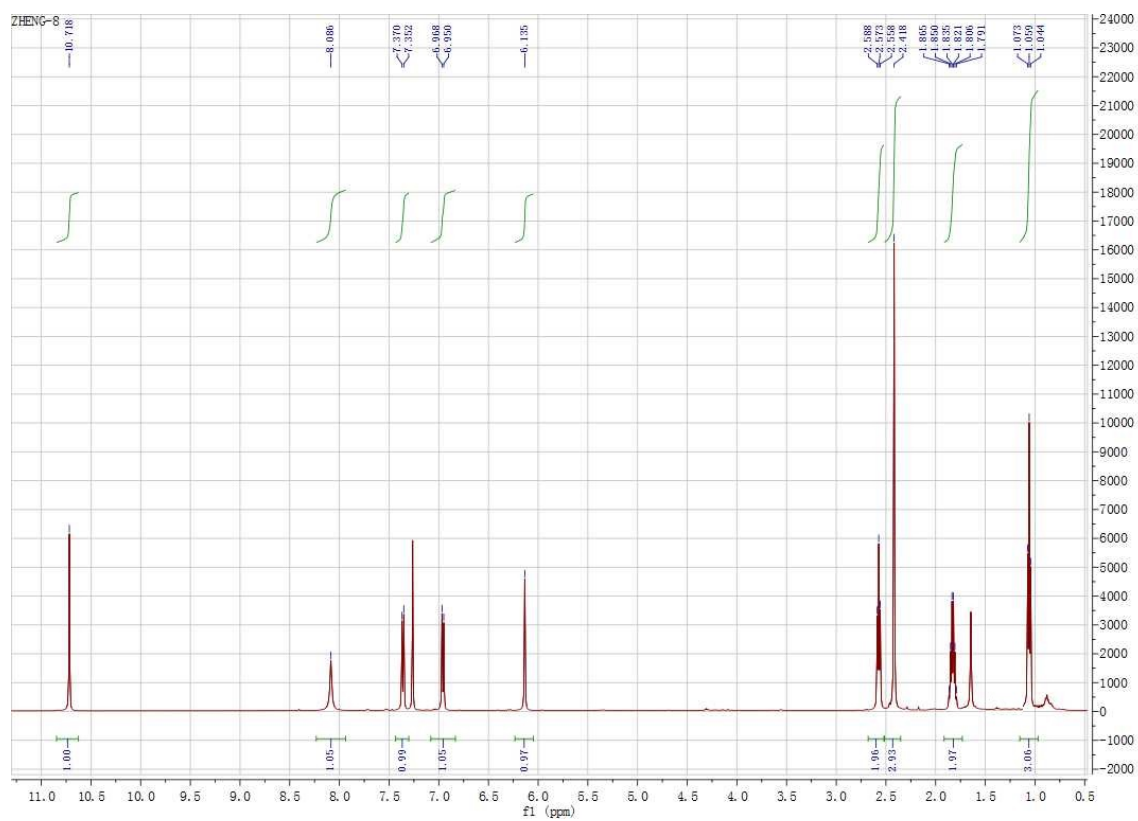

Figure S9.  $^1\text{H}$  NMR of 4ba

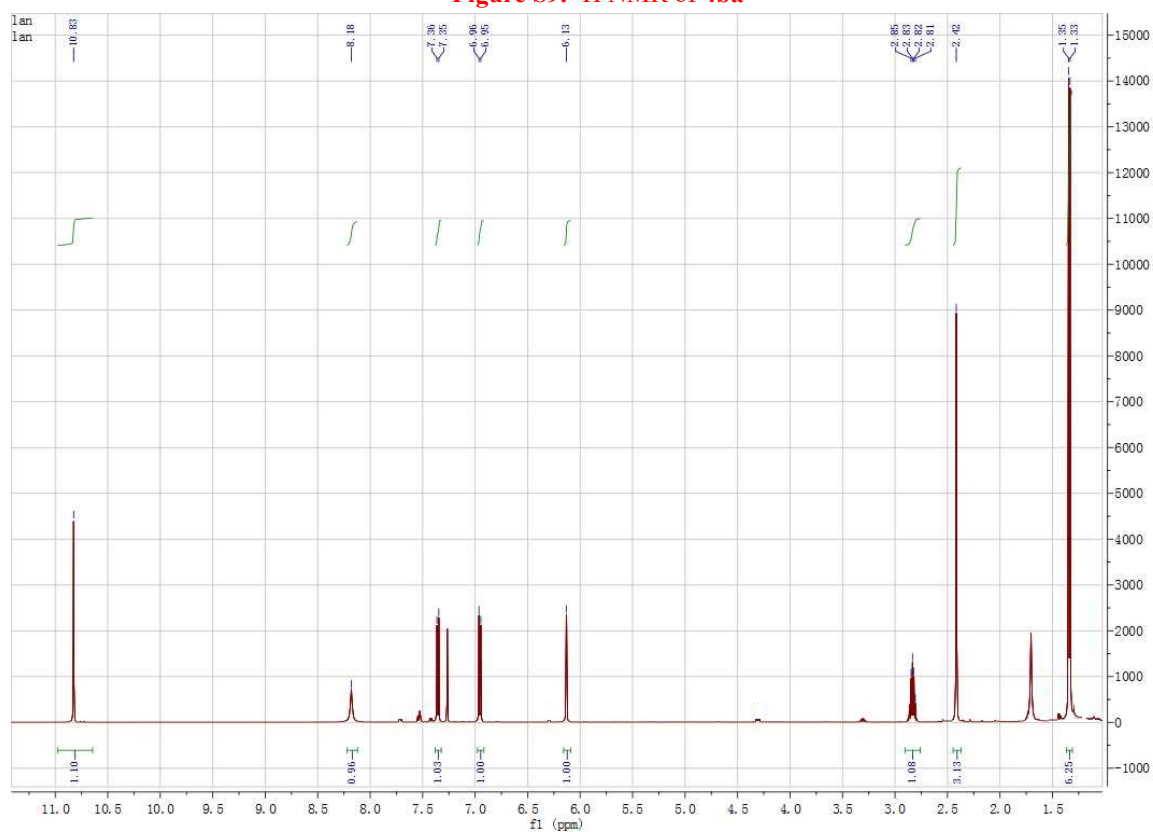

Figure S10.  $^1\text{H}$  NMR of 4bb

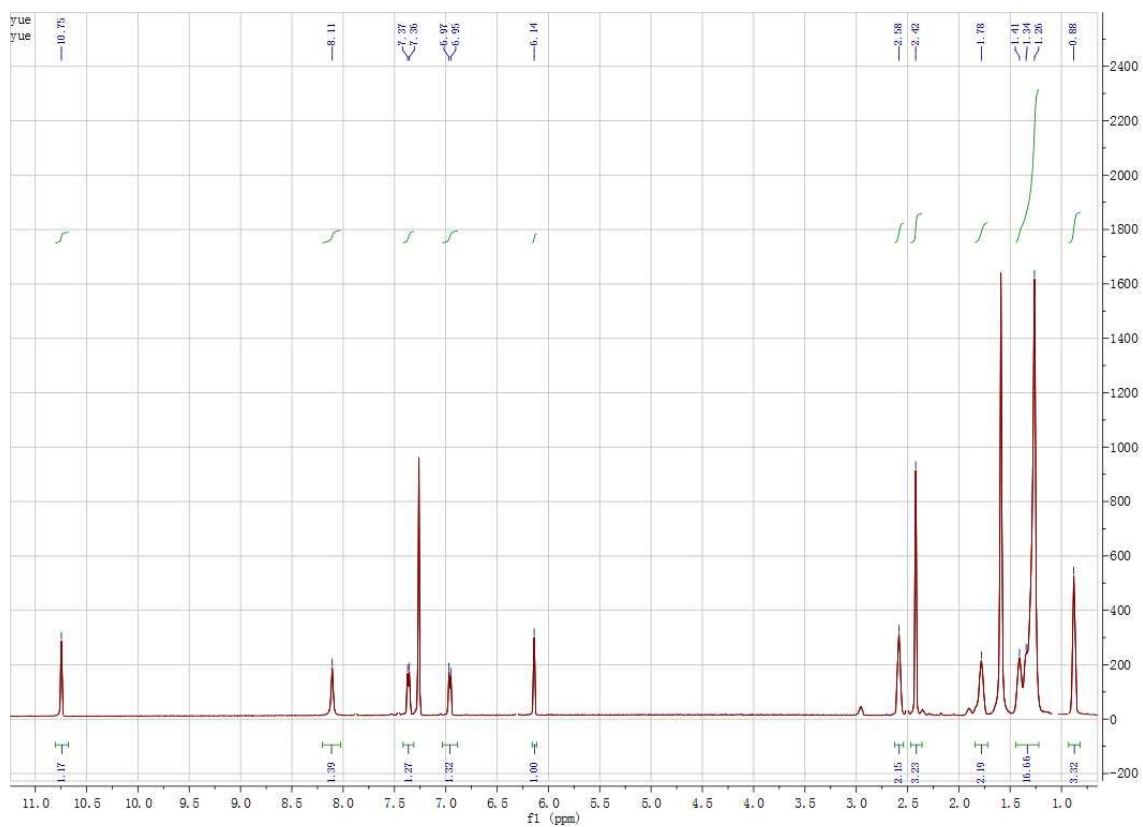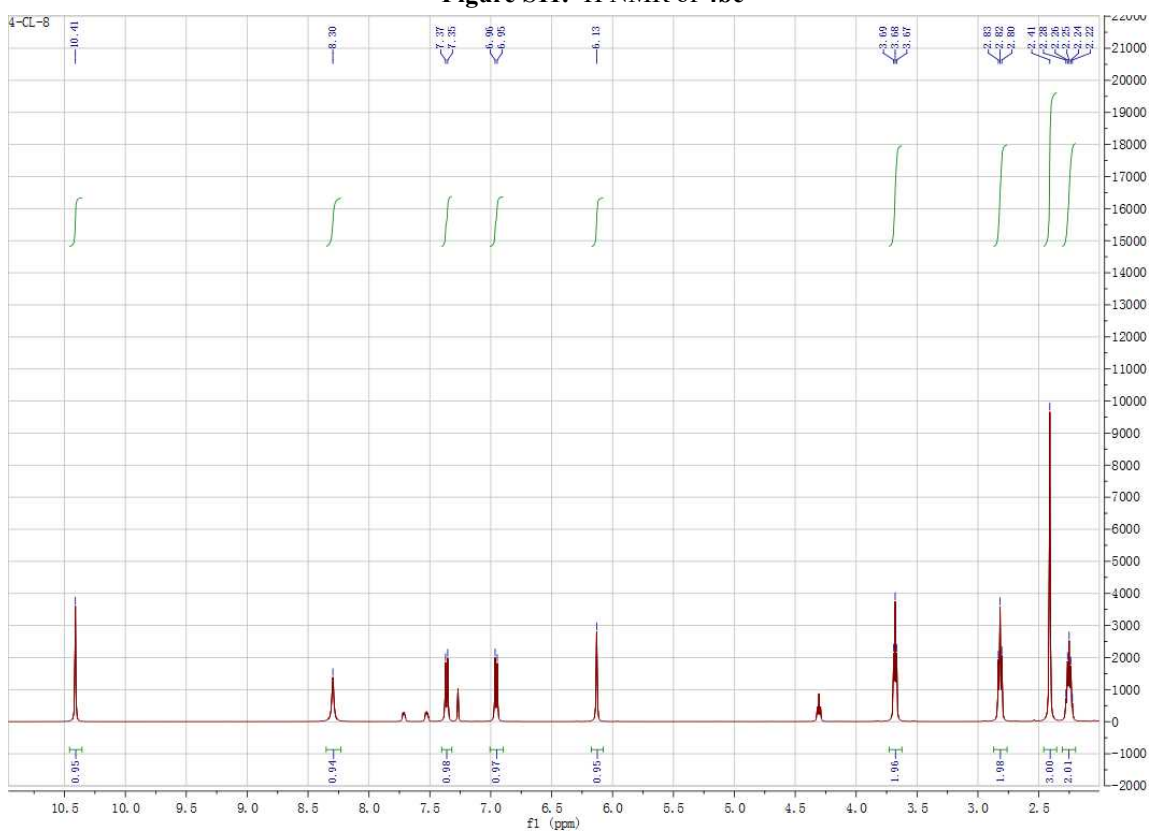

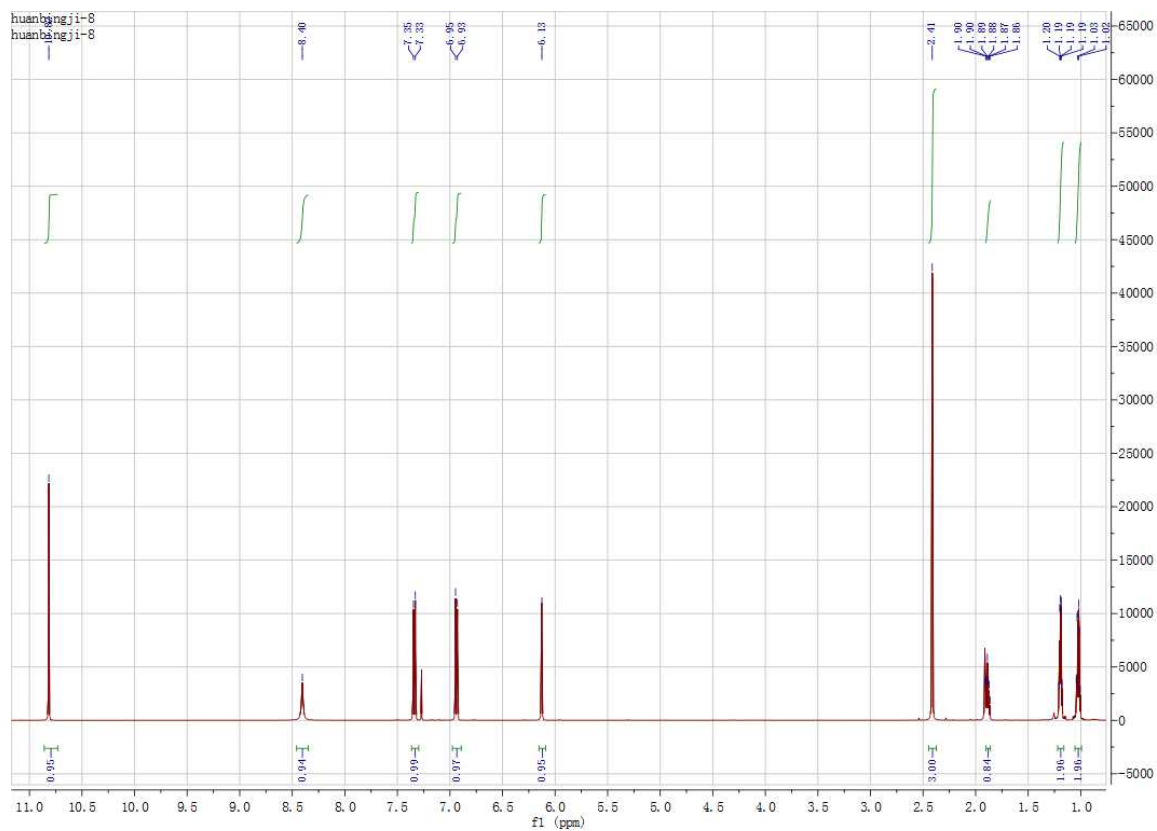

Figure S13.  $^1\text{H}$  NMR of 4be

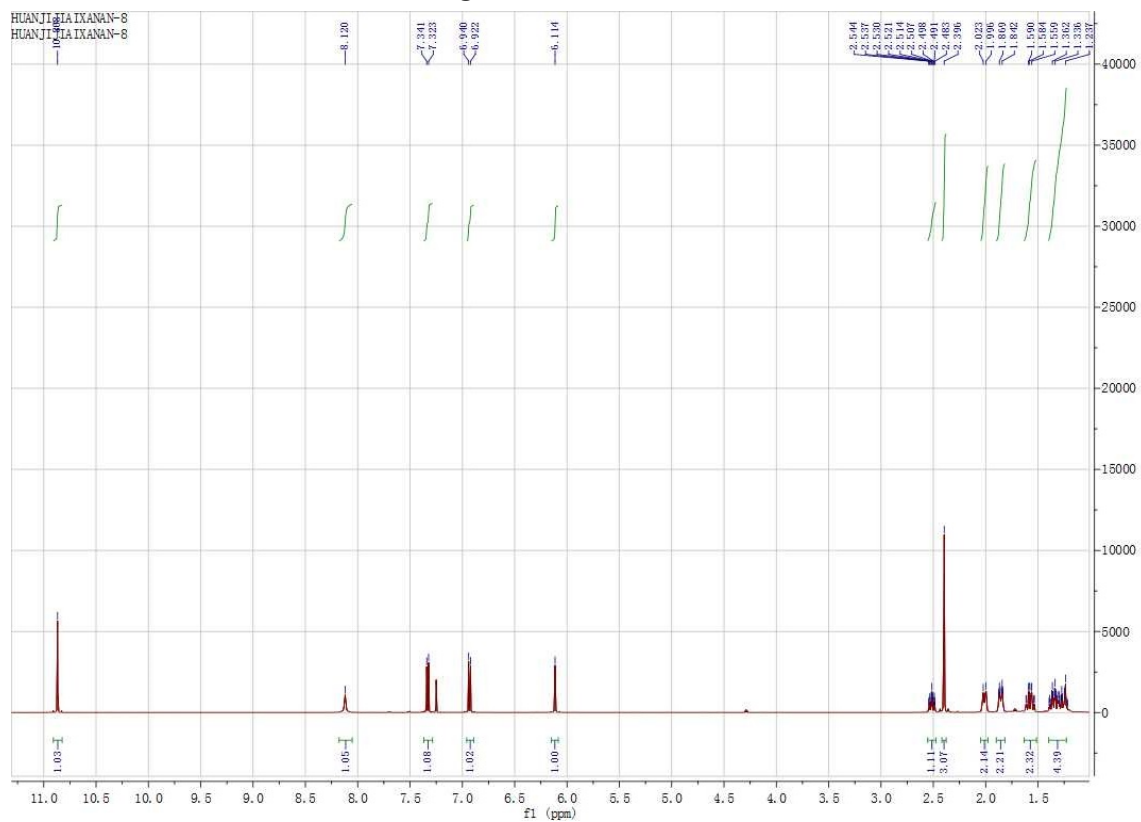

Figure S14.  $^1\text{H}$  NMR of 4bf

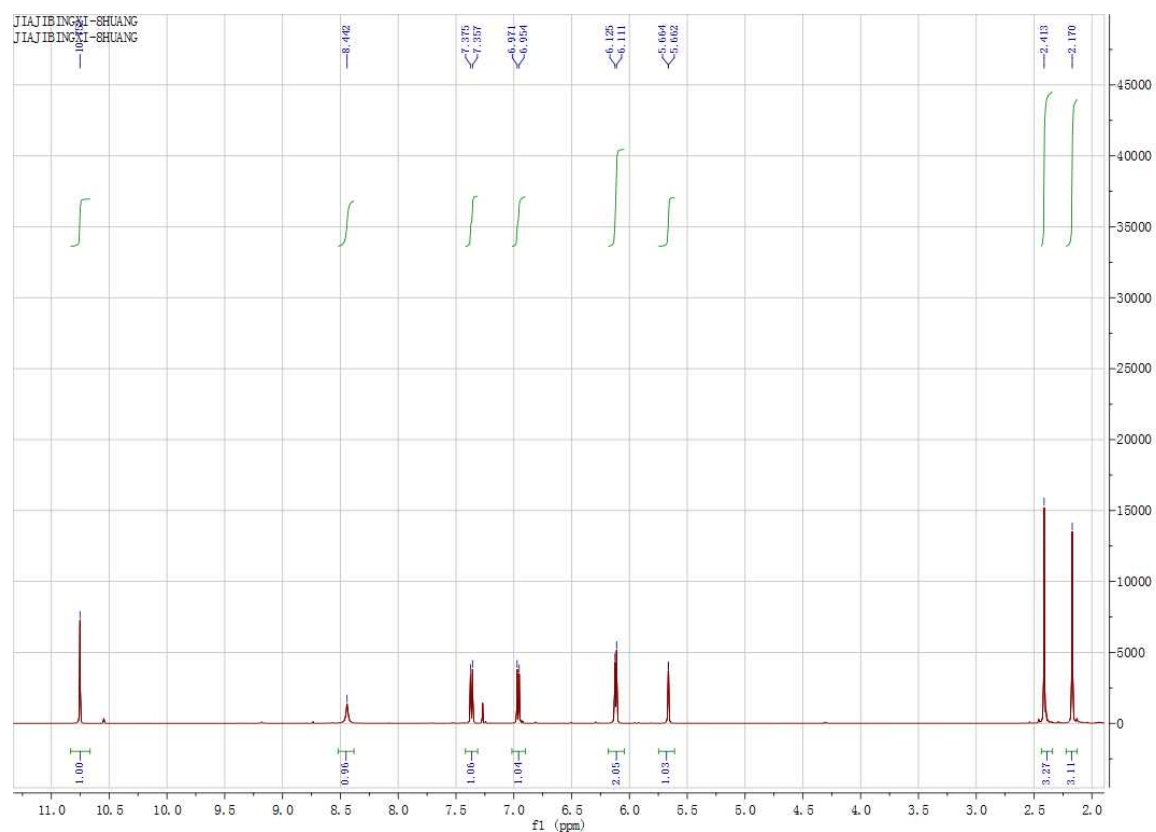

Figure S15.  $^1\text{H}$  NMR of 4bg

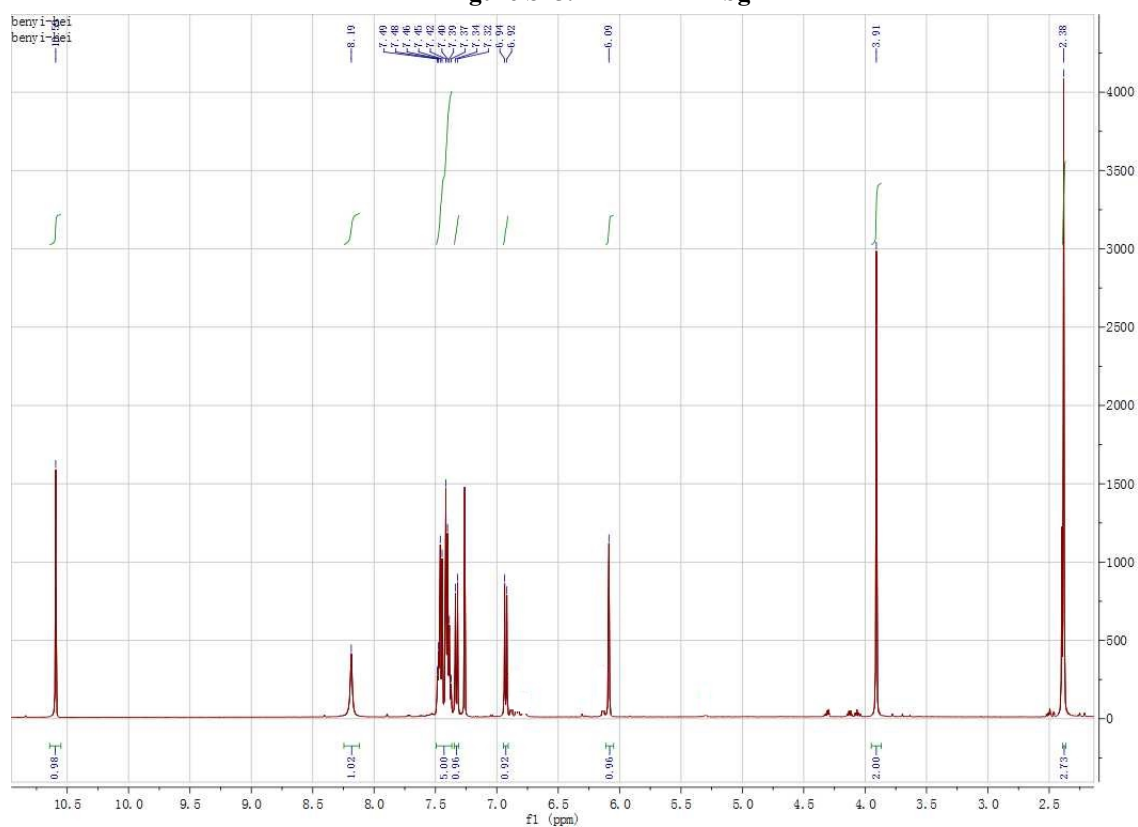

Figure S16.  $^1\text{H}$  NMR of 4bh

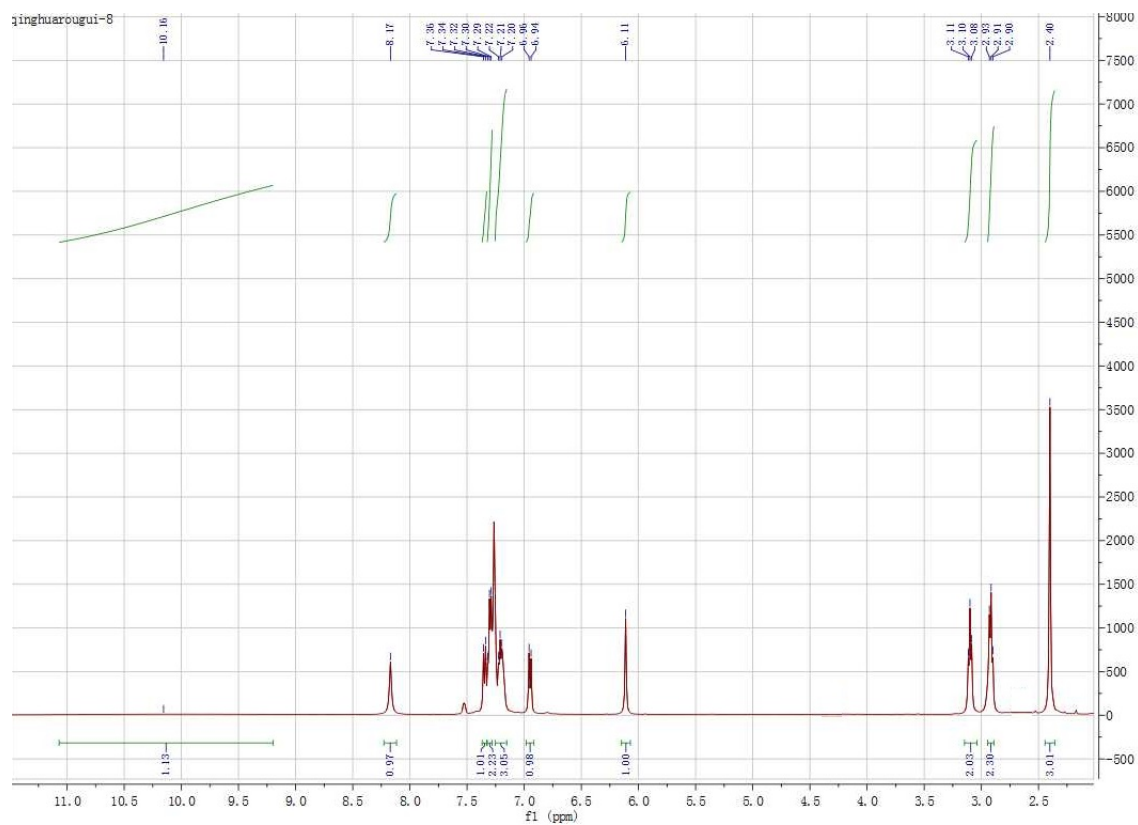

Figure S17.  $^1\text{H}$  NMR of 4bi

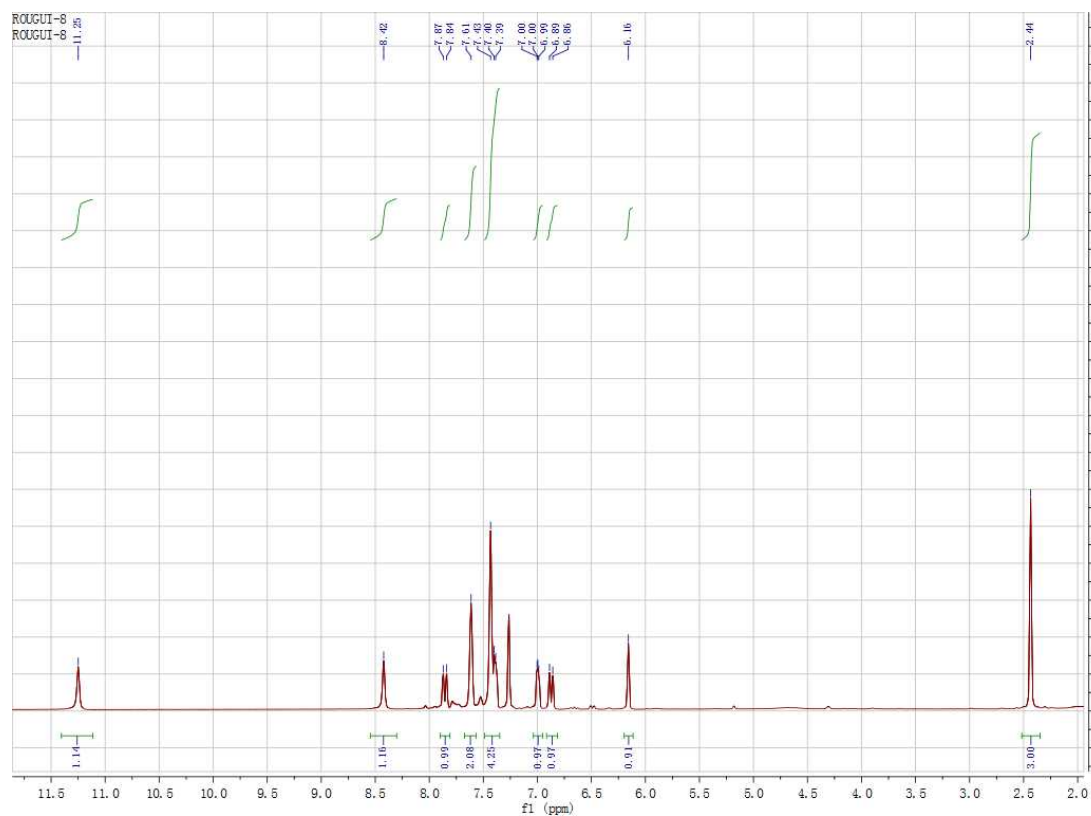

Figure S18.  $^1\text{H}$  NMR of 4bj

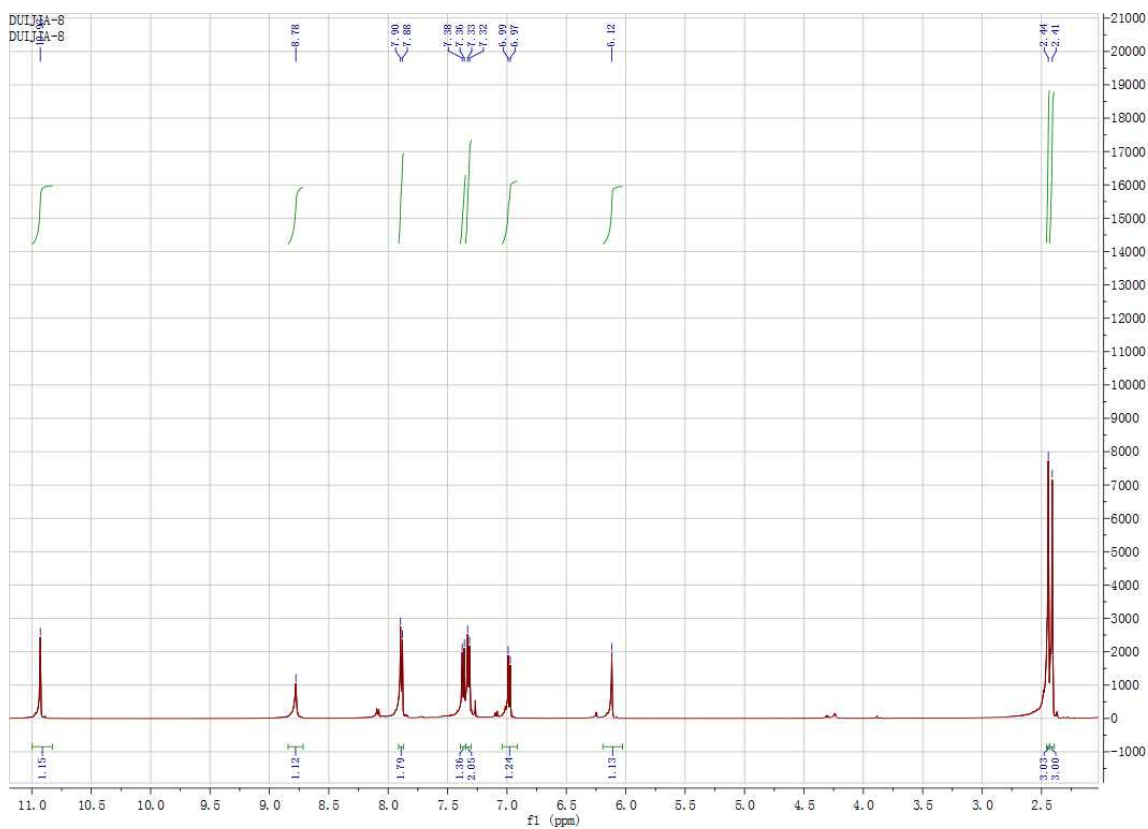

Figure S19.  $^1\text{H}$  NMR of 4bk

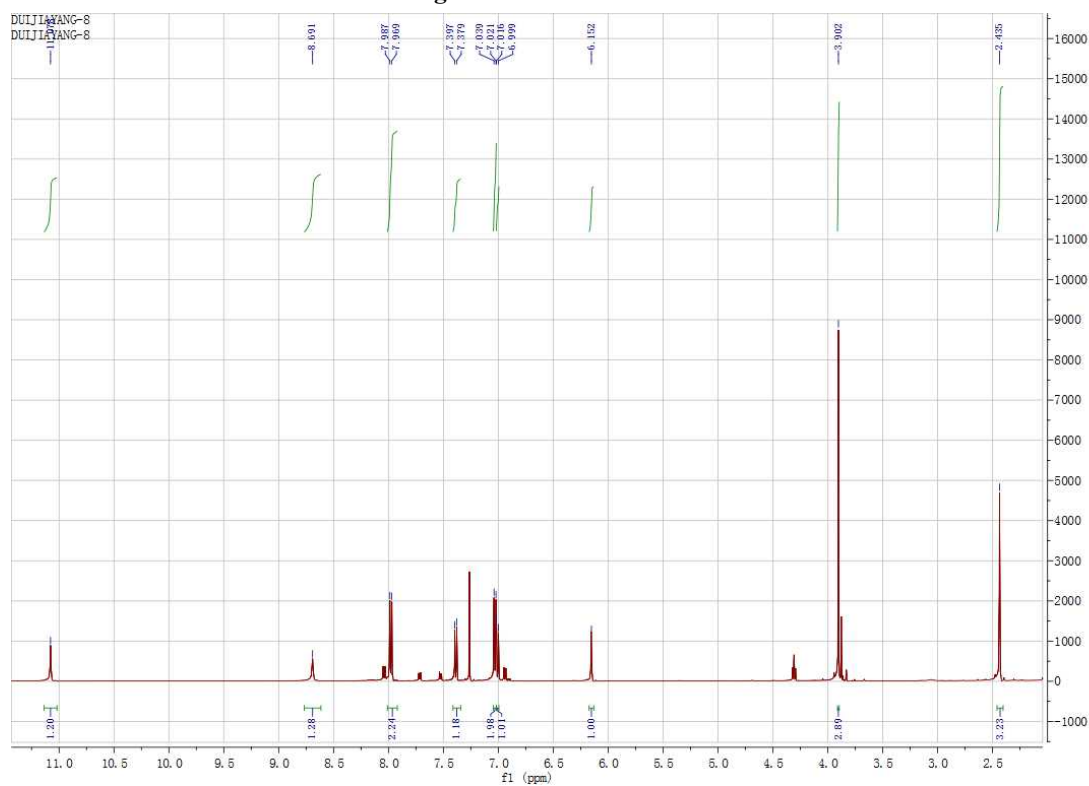

Figure S20.  $^1\text{H}$  NMR of 4bl

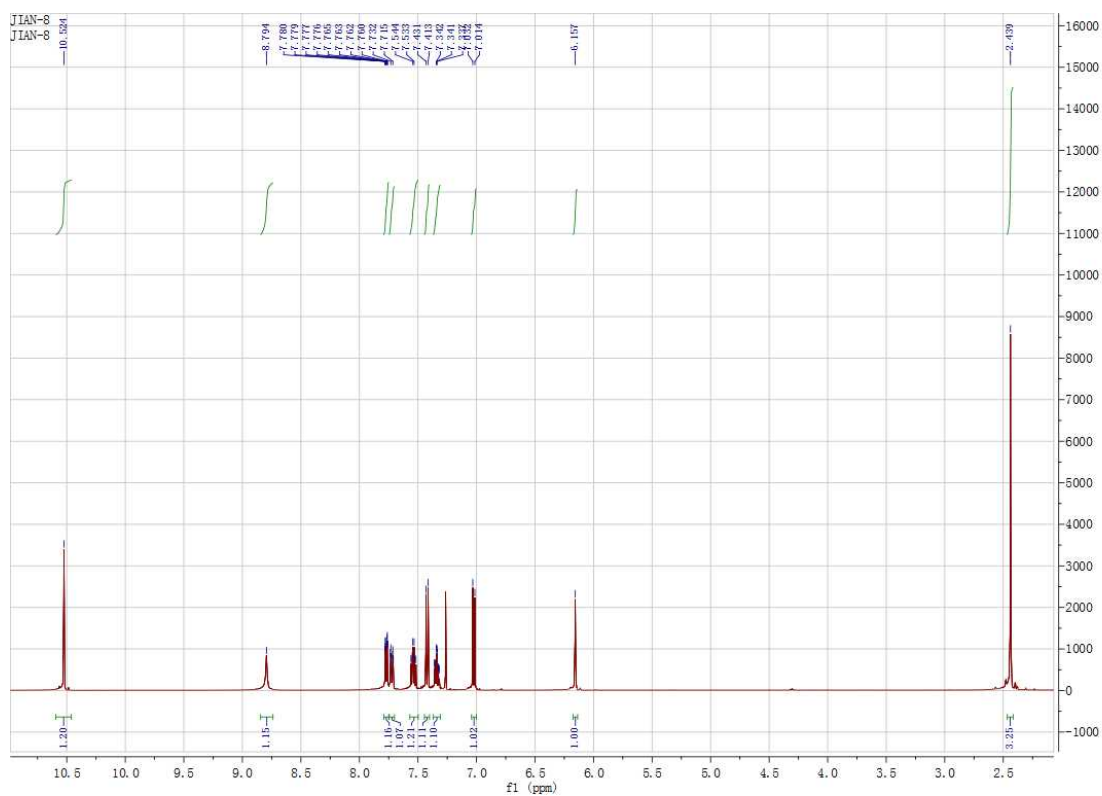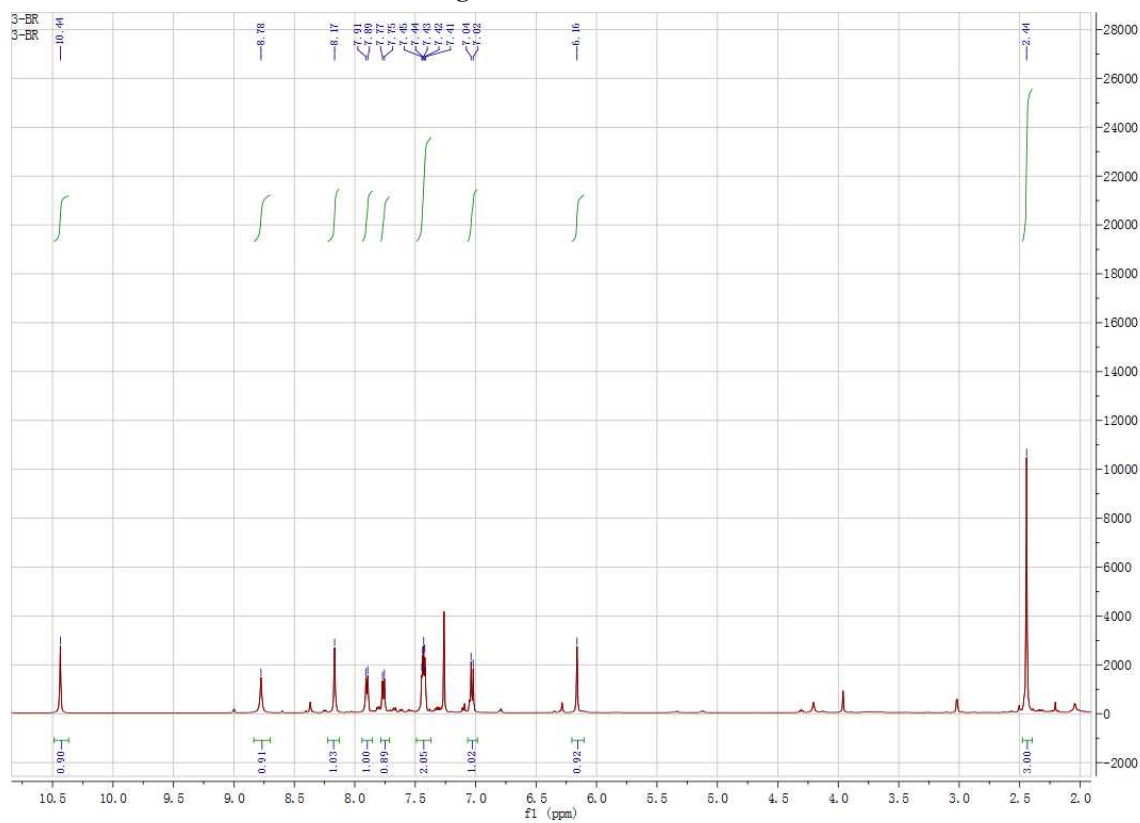

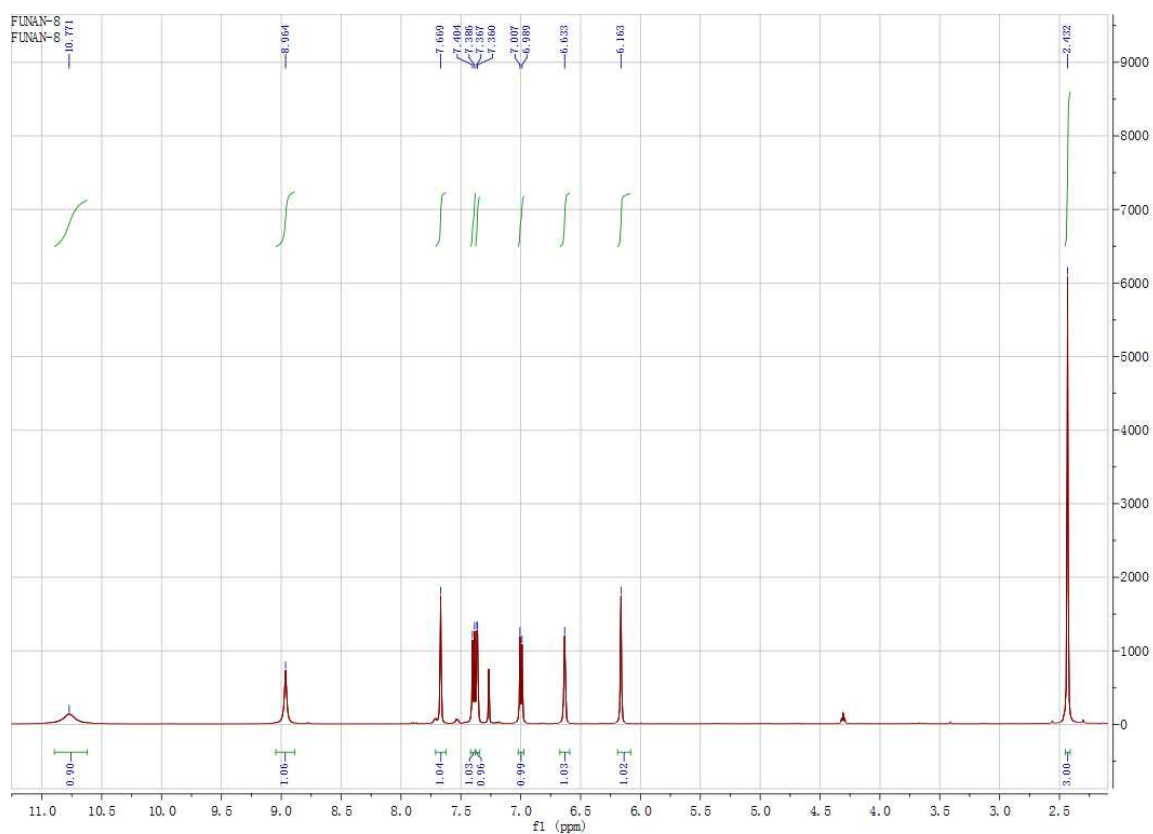

Figure S23.  $^1\text{H}$  NMR of 4bo

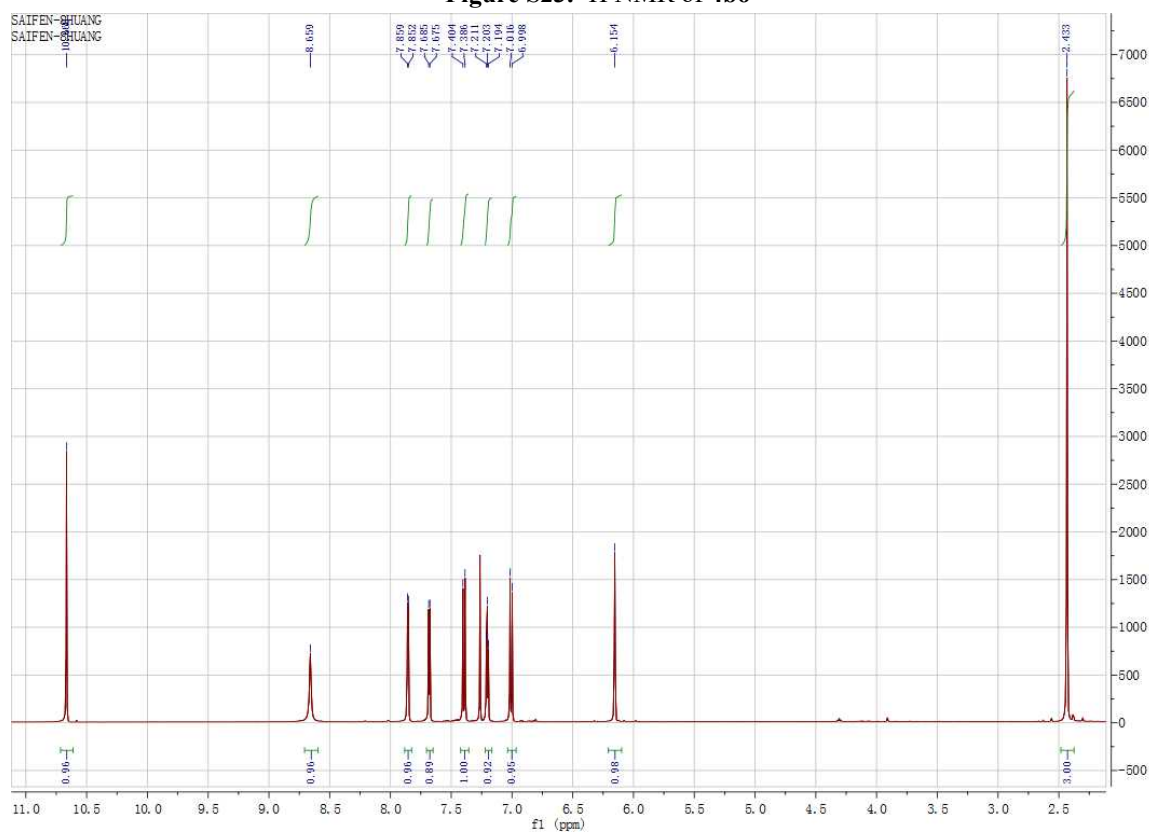

Figure S24.  $^1\text{H}$  NMR of 4bp

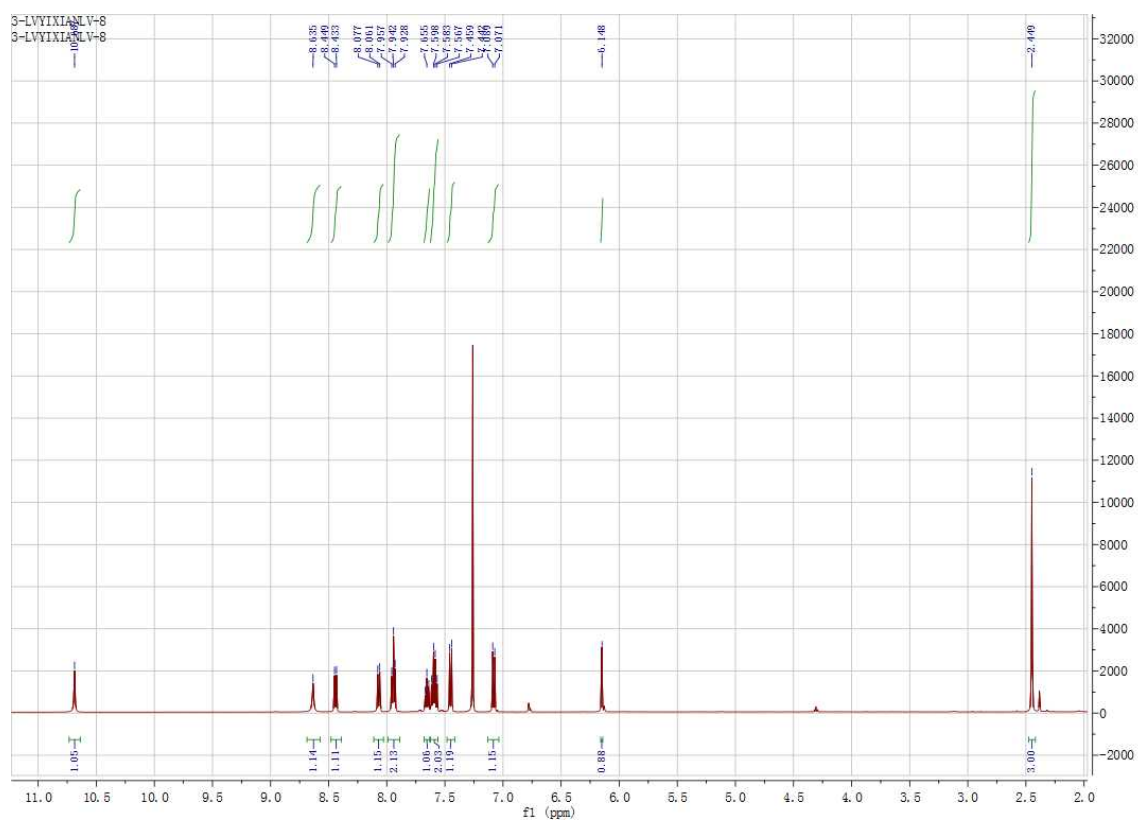

Figure S25.  $^1\text{H}$  NMR of 4bq

The  $^{13}\text{C}$  NMR Spectra of Compounds **4aa-4bq**.

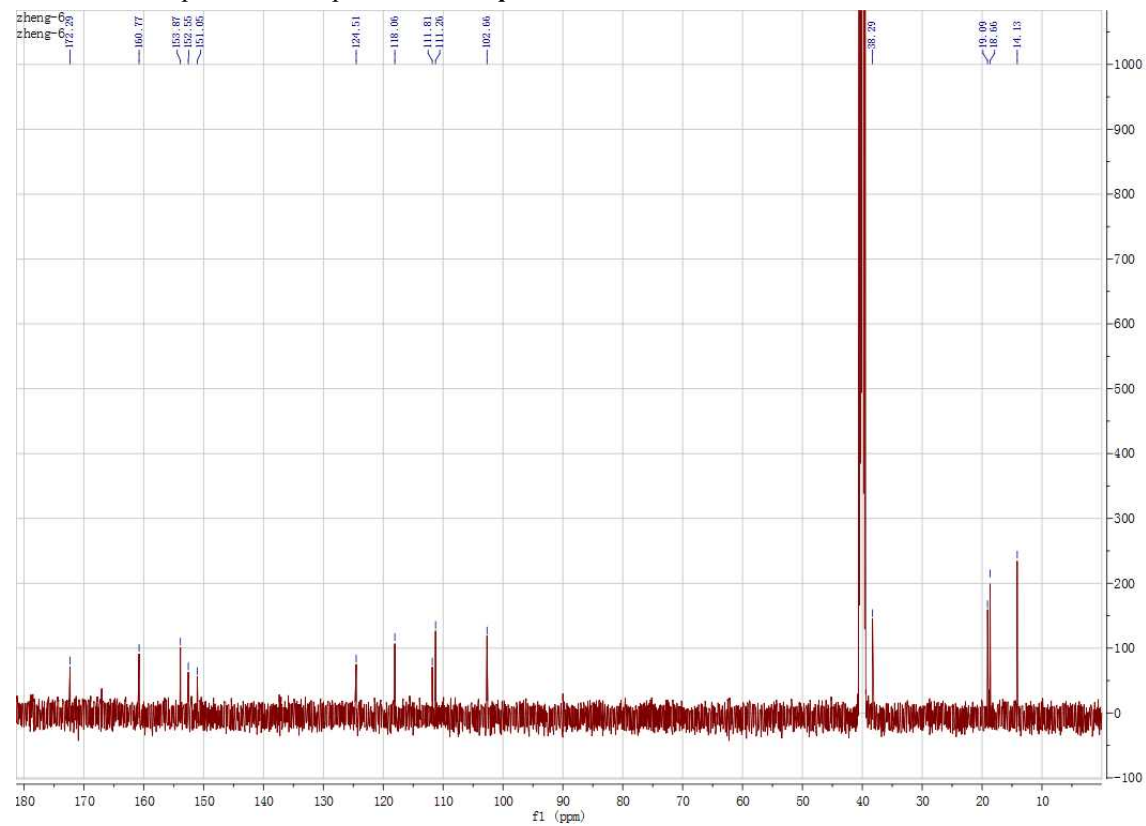

Figure S26.  $^{13}\text{C}$  NMR of **4aa**

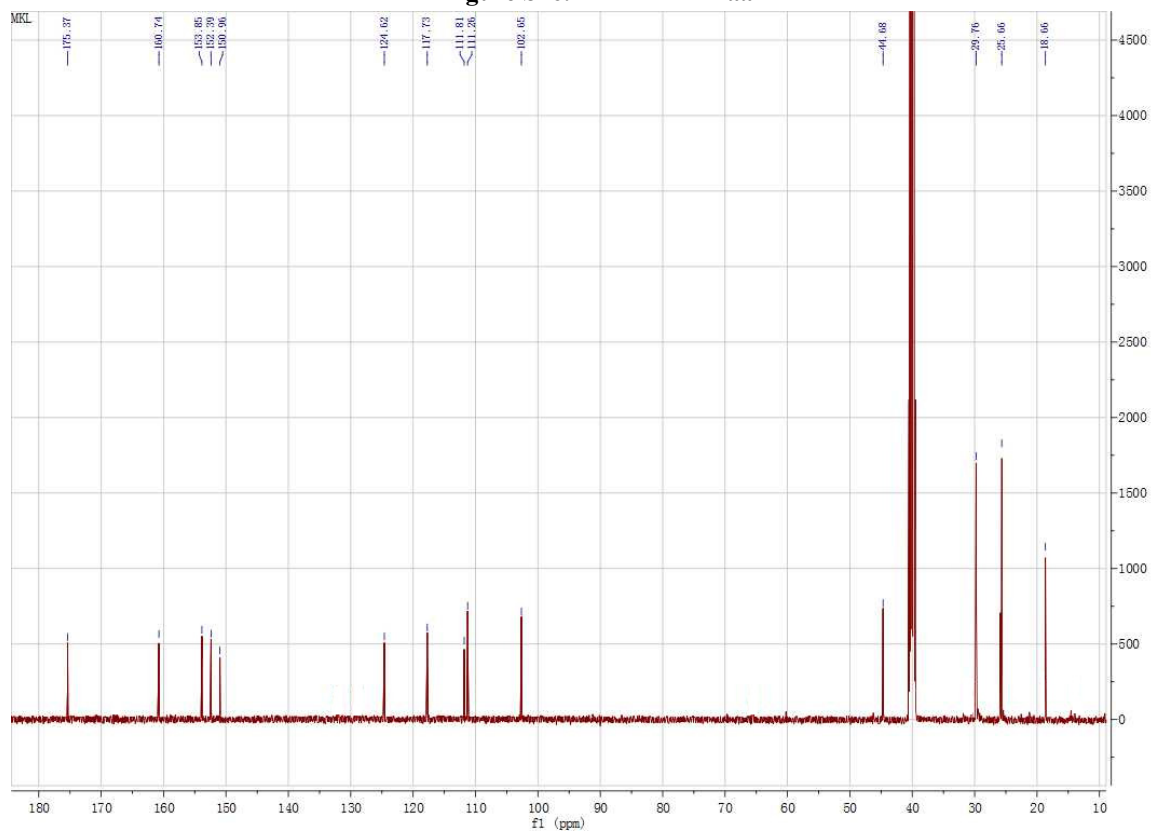

Figure S27.  $^{13}\text{C}$  NMR of **4ab**

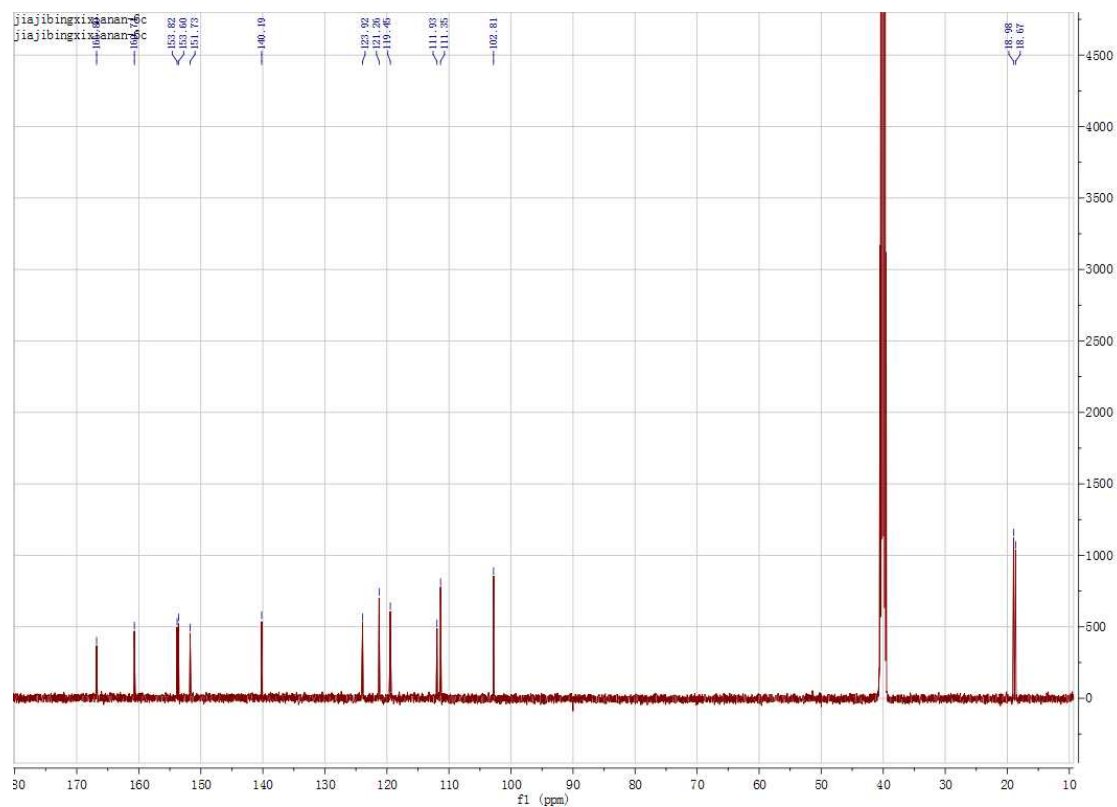

Figure S28. <sup>13</sup>C NMR of 4ac

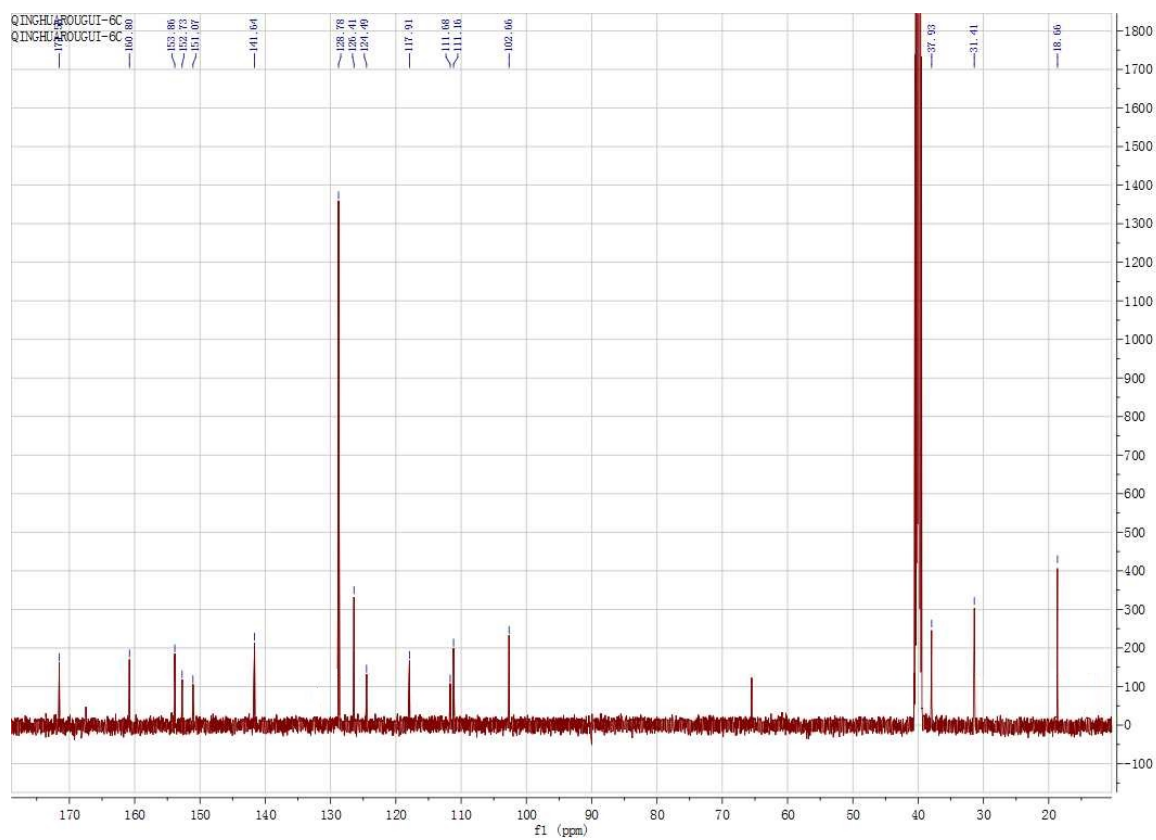

Figure S29. <sup>13</sup>C NMR of 4ad

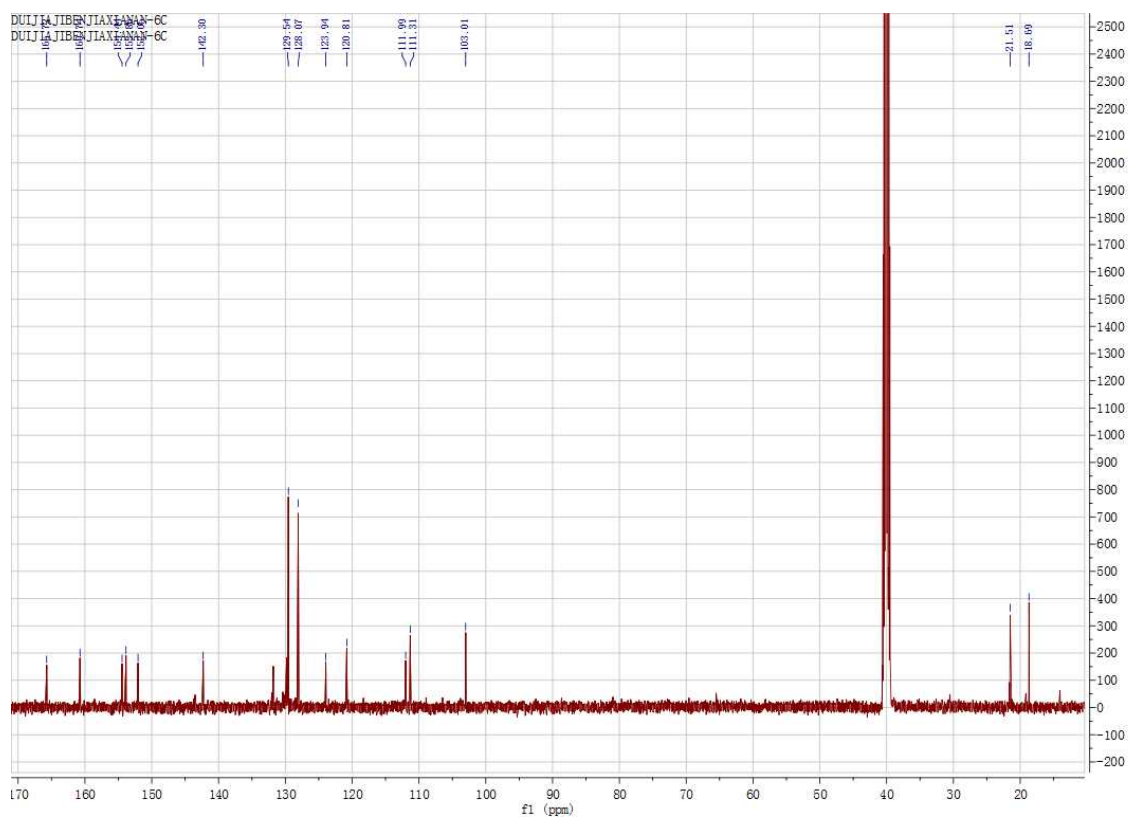

Figure S30.  $^{13}\text{C}$  NMR of 4ae

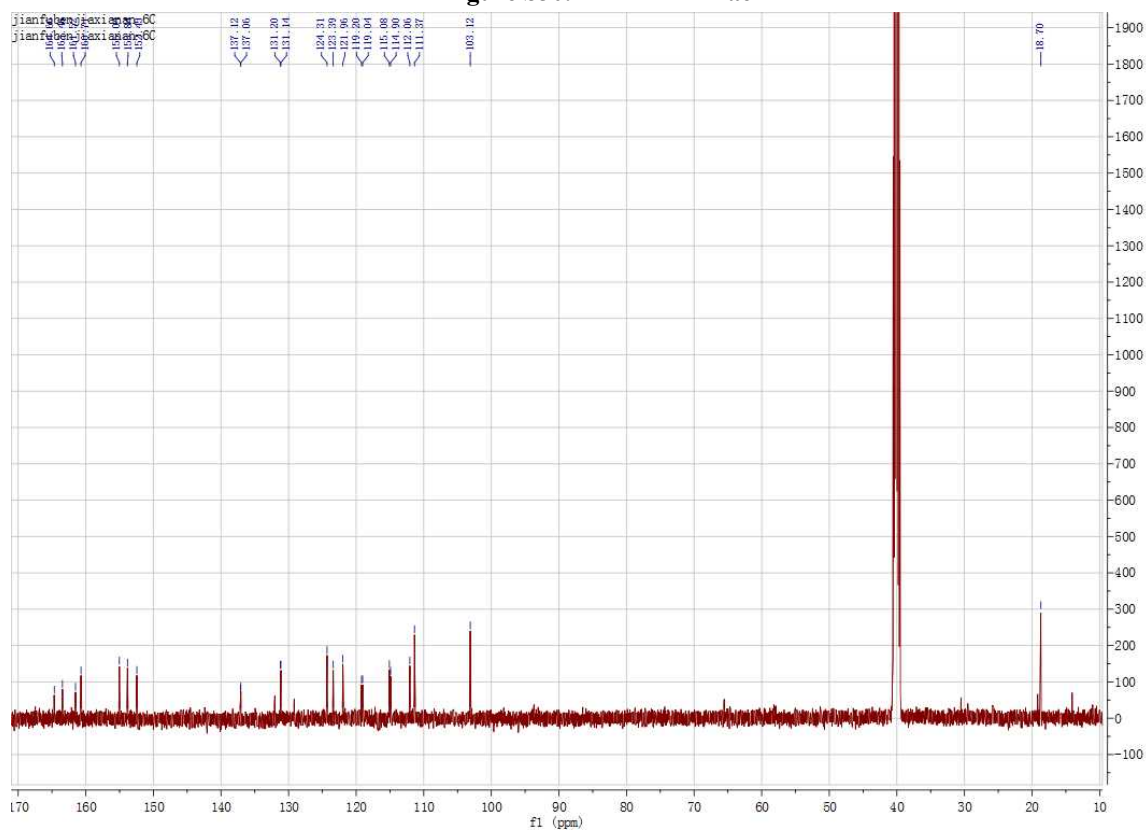

Figure S31.  $^{13}\text{C}$  NMR of 4af

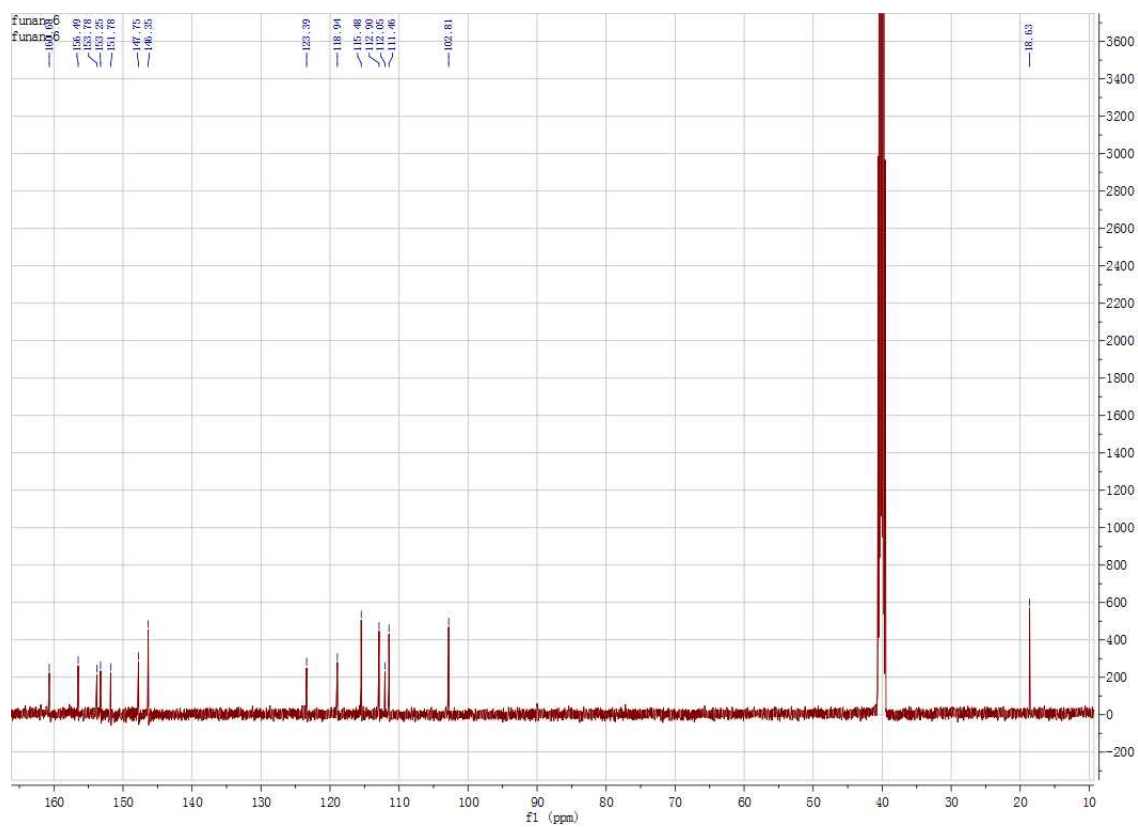

Figure S32.  $^{13}\text{C}$  NMR of 4ag

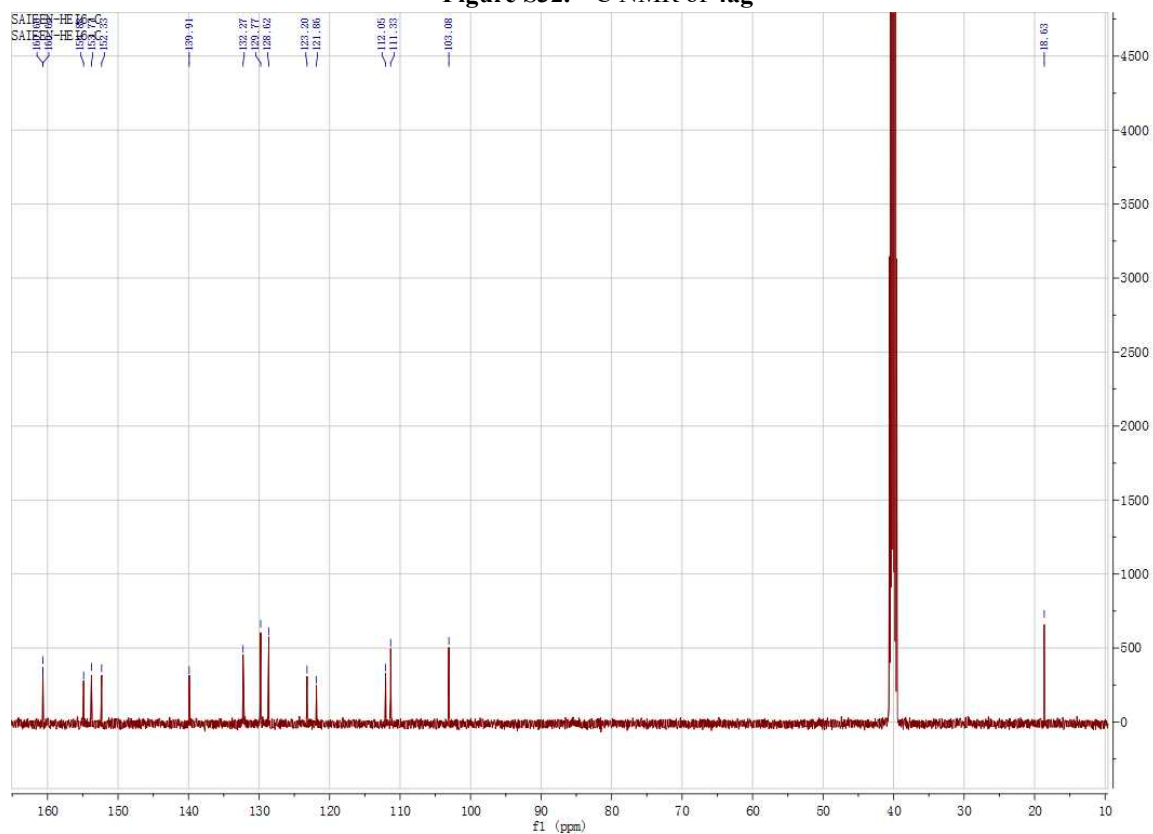

Figure S33.  $^{13}\text{C}$  NMR of 4ah

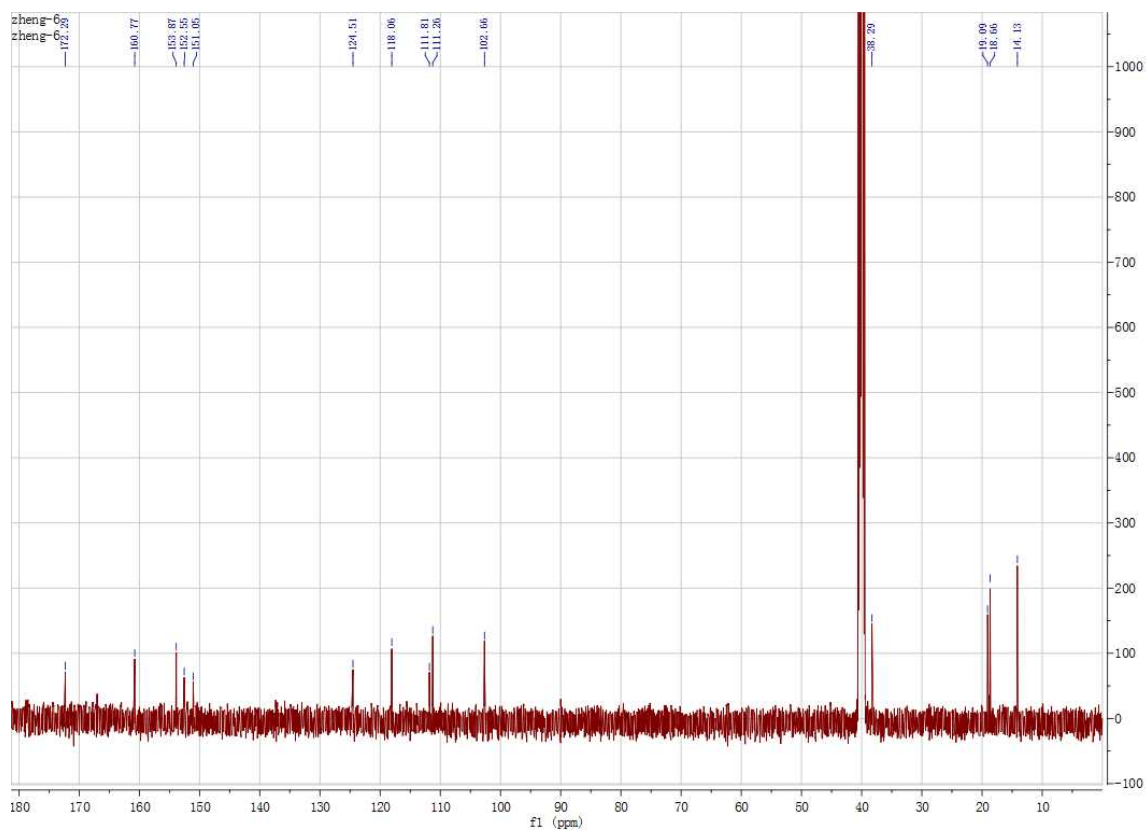

Figure S34.  $^{13}\text{C}$  NMR of 4ba

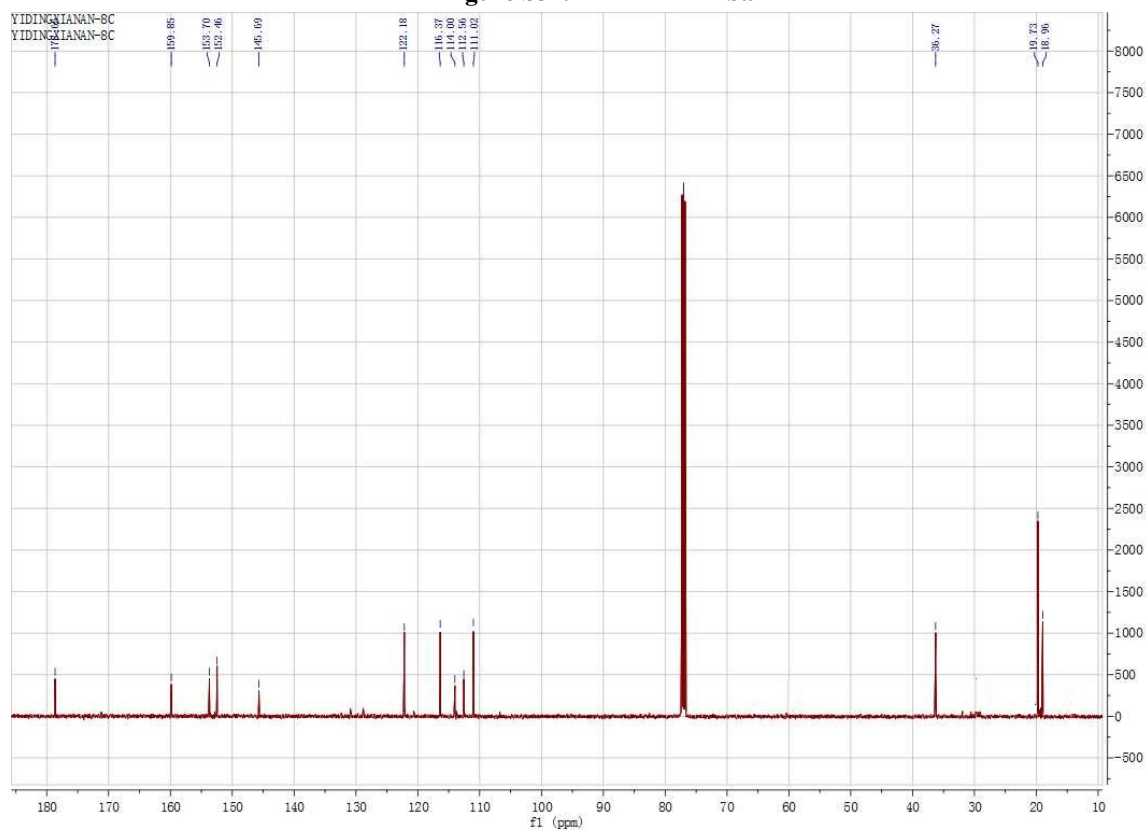

Figure S35.  $^{13}\text{C}$  NMR of 4bb

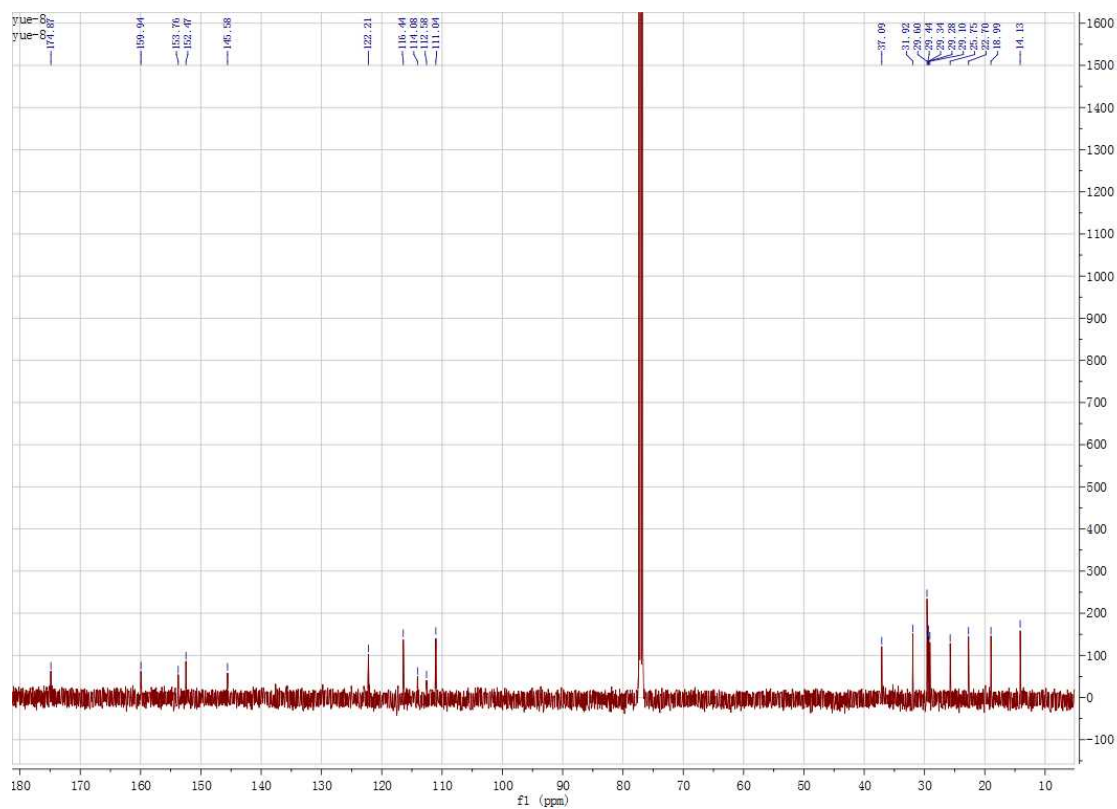

Figure S36. <sup>13</sup>C NMR of 4bc

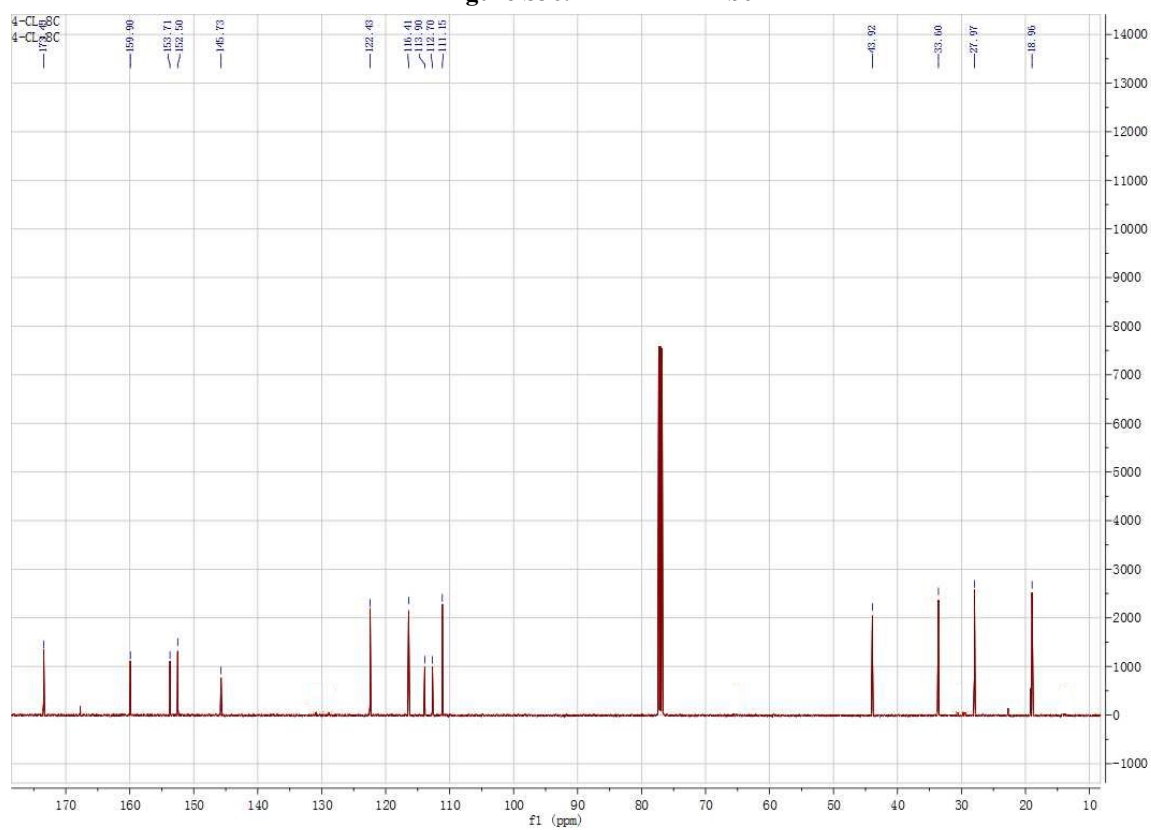

Figure S37. <sup>13</sup>C NMR of 4bd

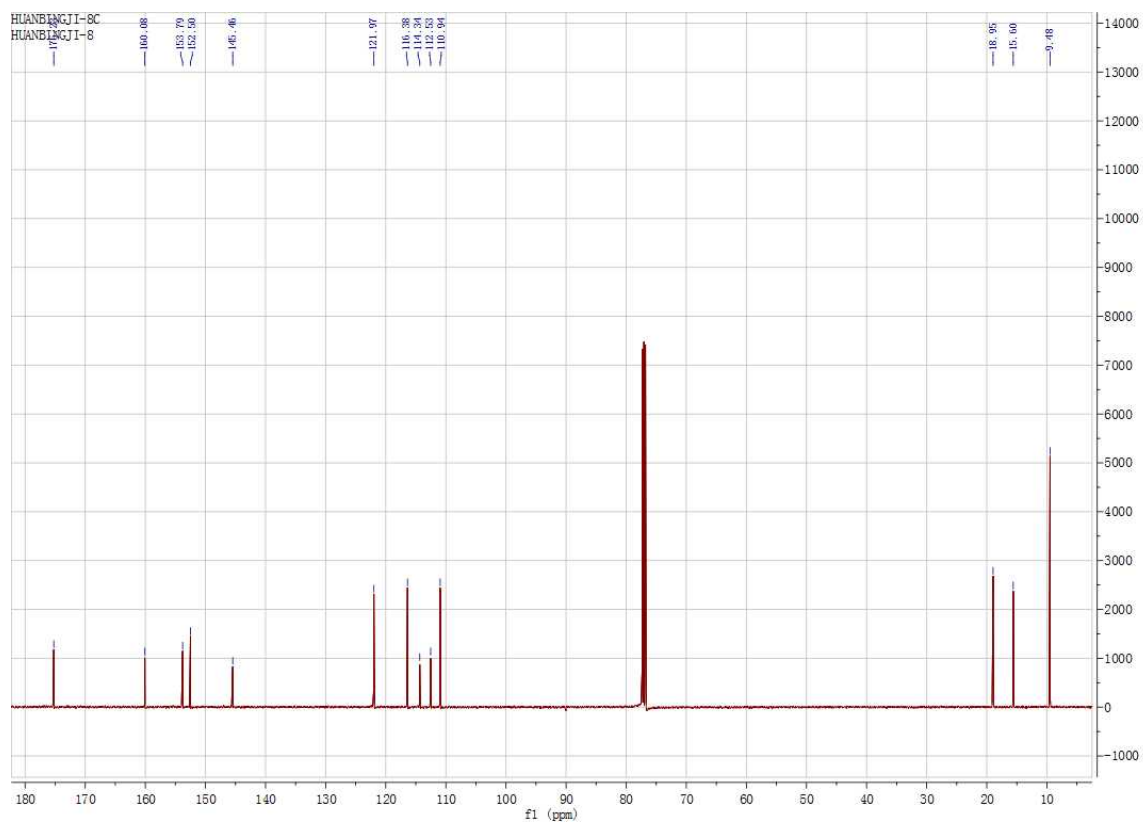

Figure S38.  $^{13}\text{C}$  NMR of 4be

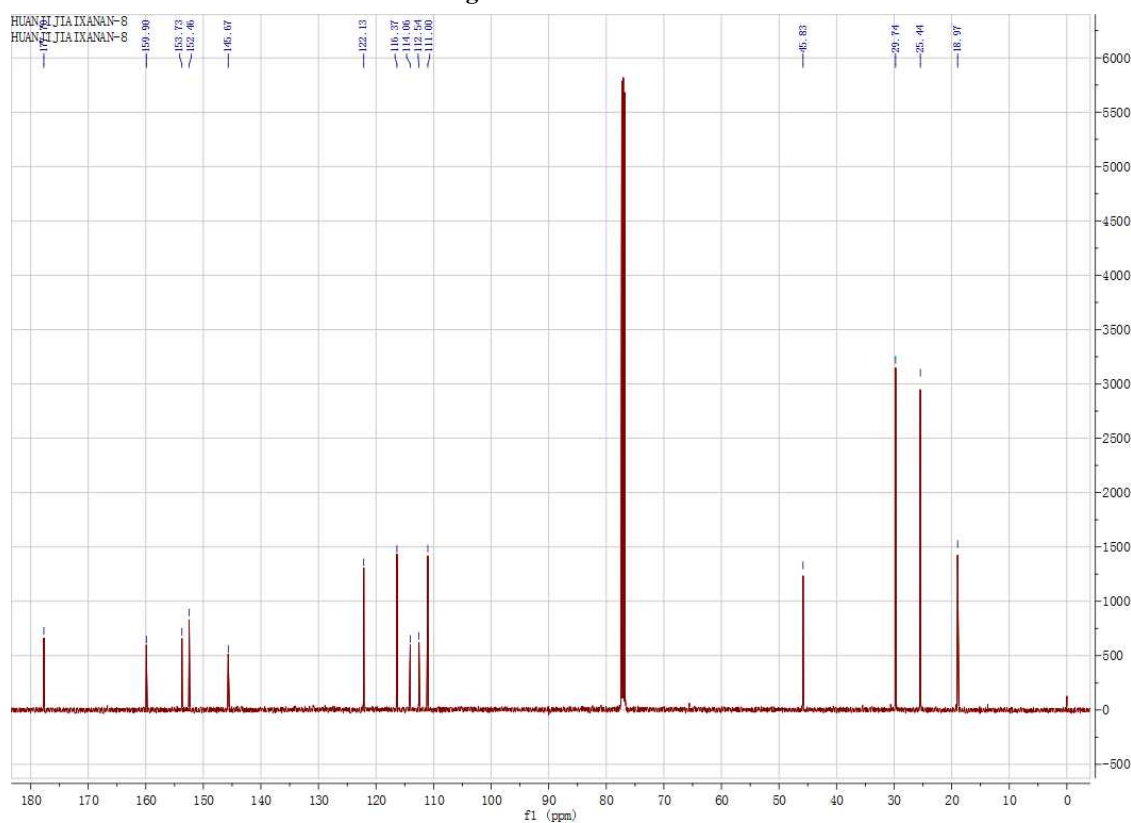

Figure S39.  $^{13}\text{C}$  NMR of 4bf

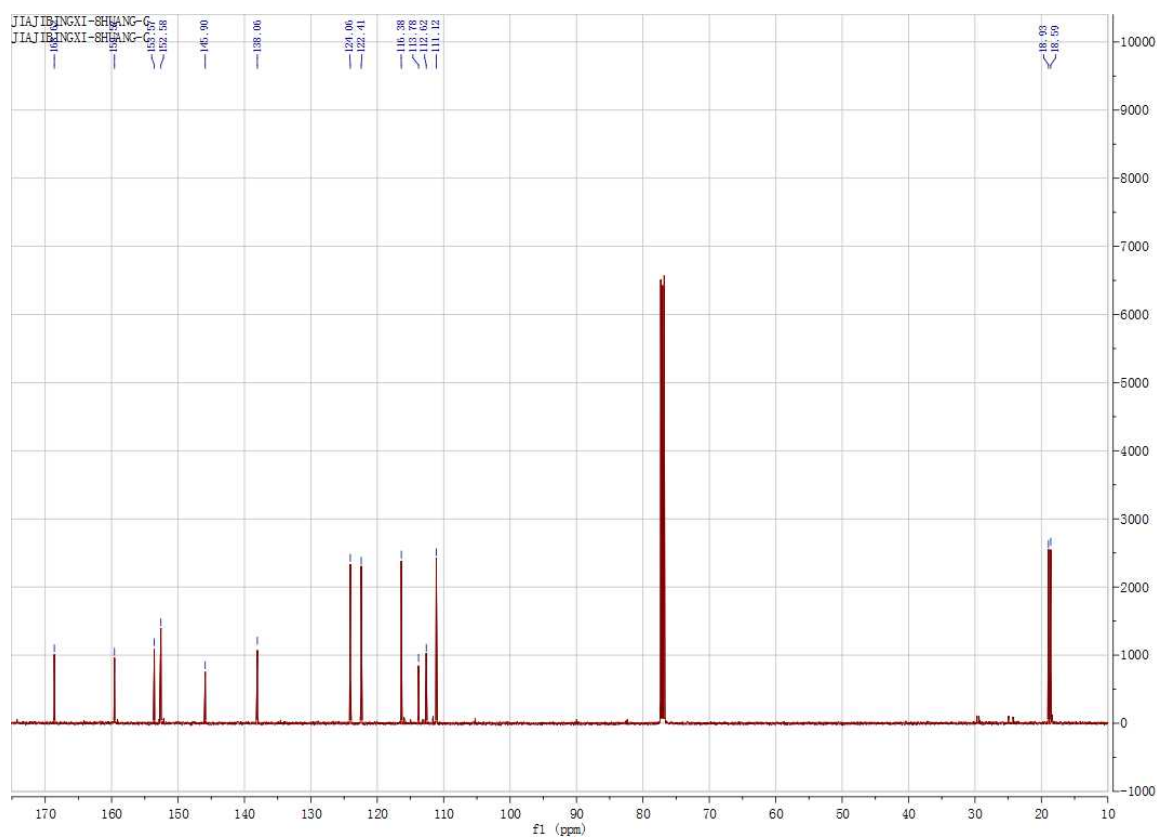

Figure S40. <sup>13</sup>C NMR of 4bg

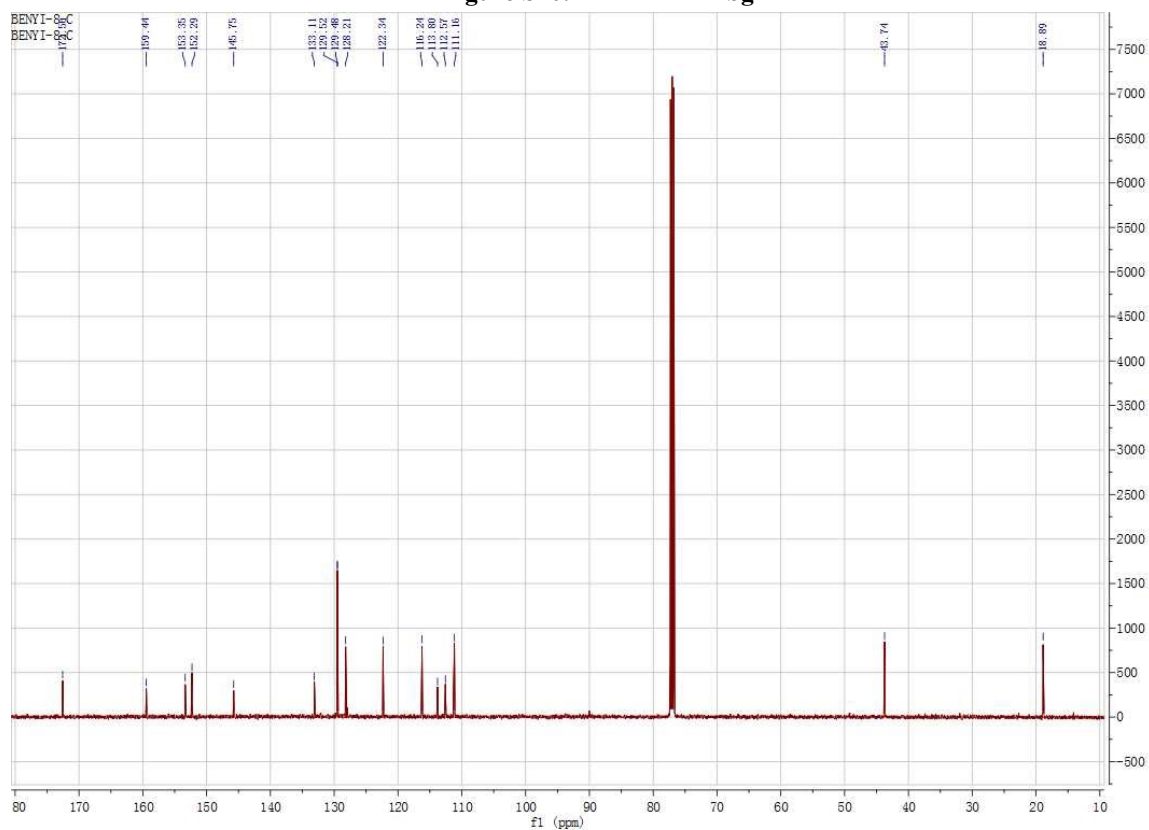

Figure S41. <sup>13</sup>C NMR of 4bh

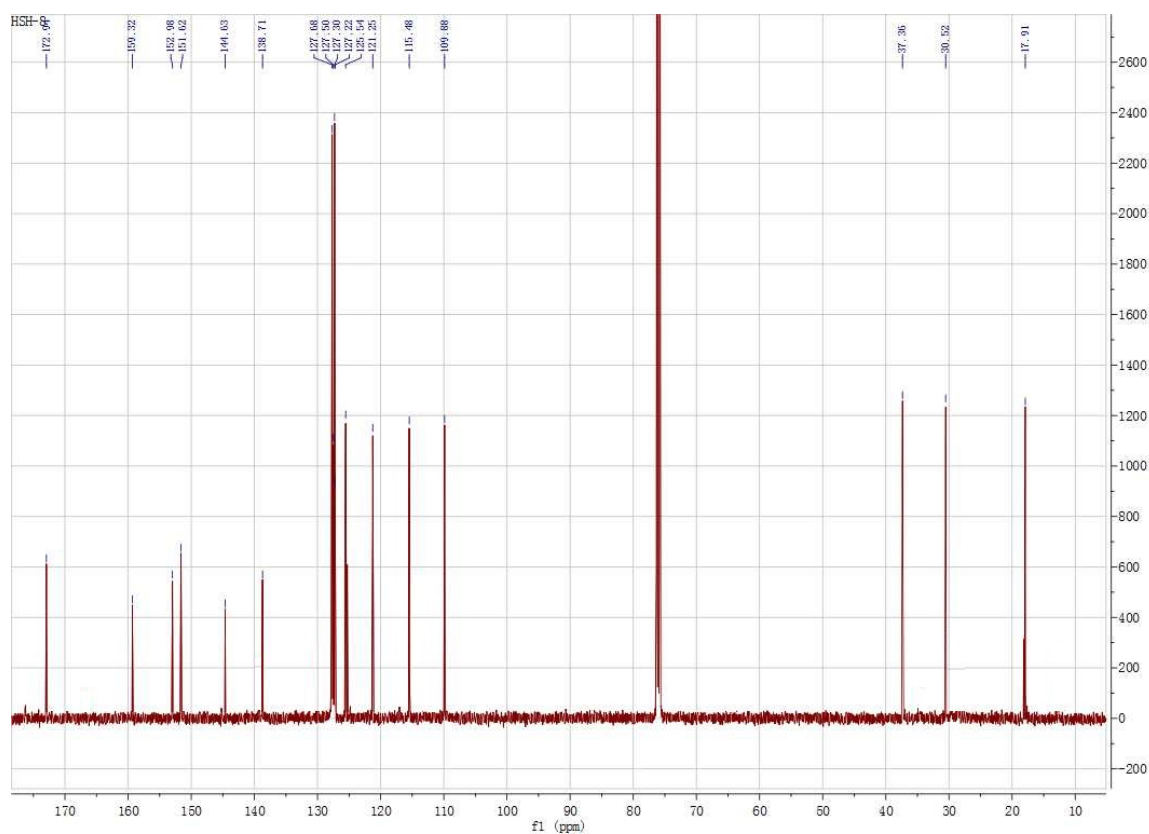

Figure S42.  $^{13}\text{C}$  NMR of 4bi

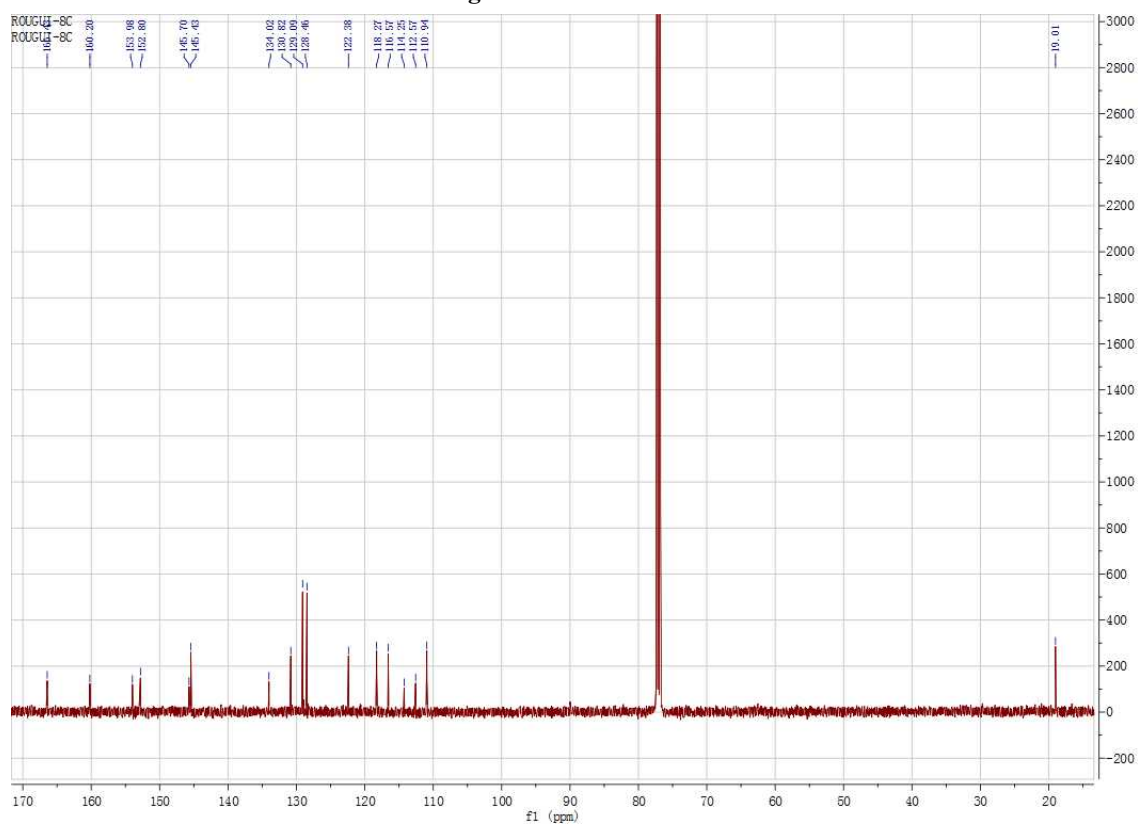

Figure S43.  $^{13}\text{C}$  NMR of 4bj

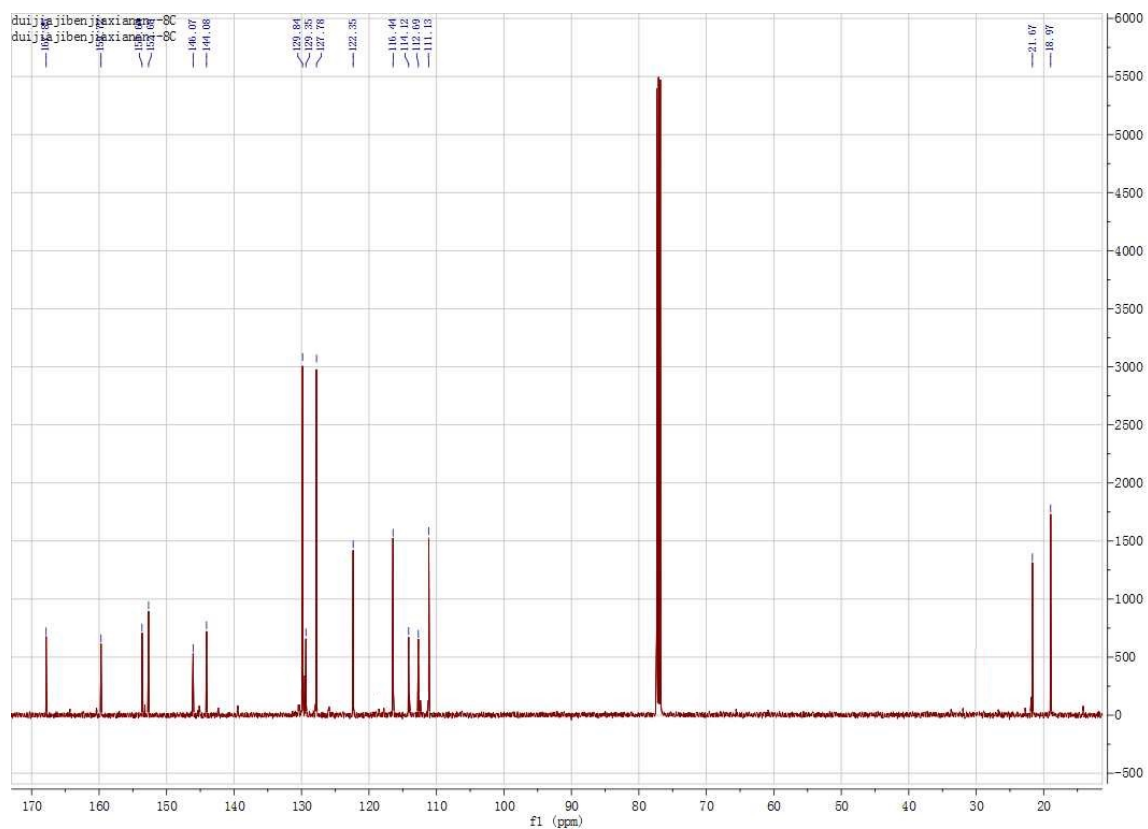

Figure S44.  $^{13}\text{C}$  NMR of 4bk

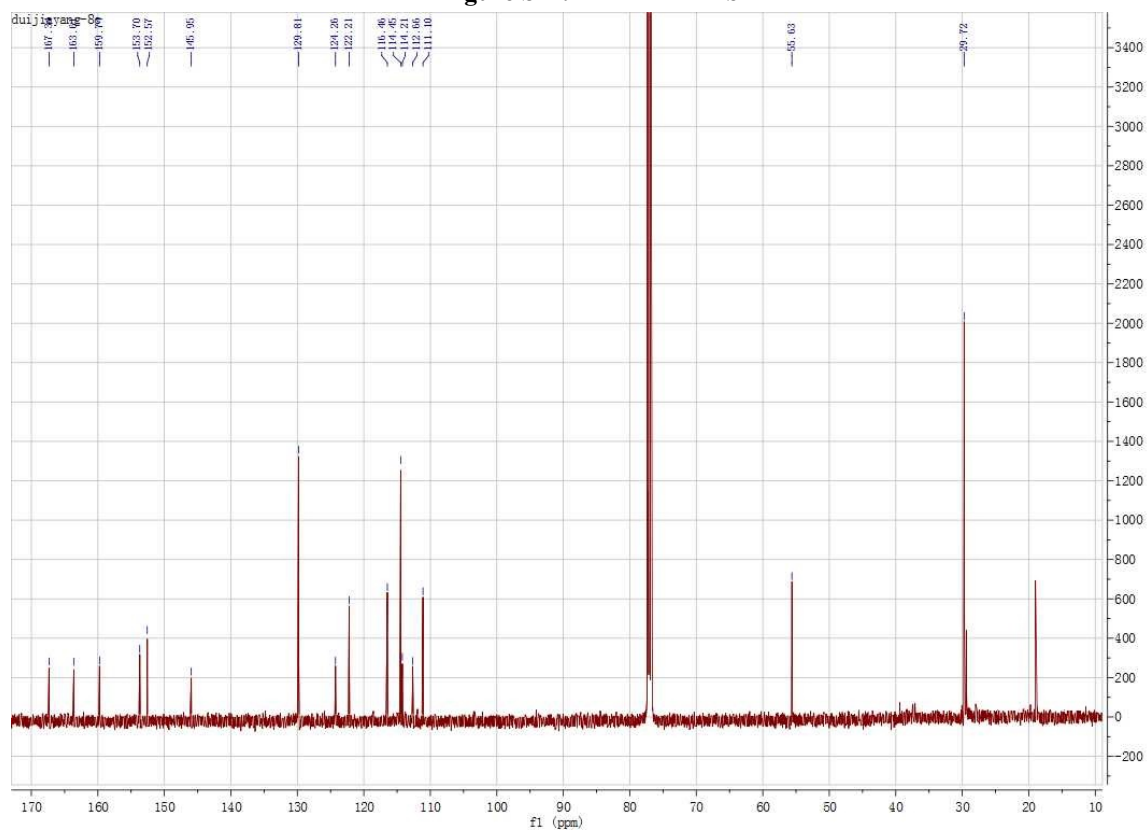

Figure S45.  $^{13}\text{C}$  NMR of 4bl

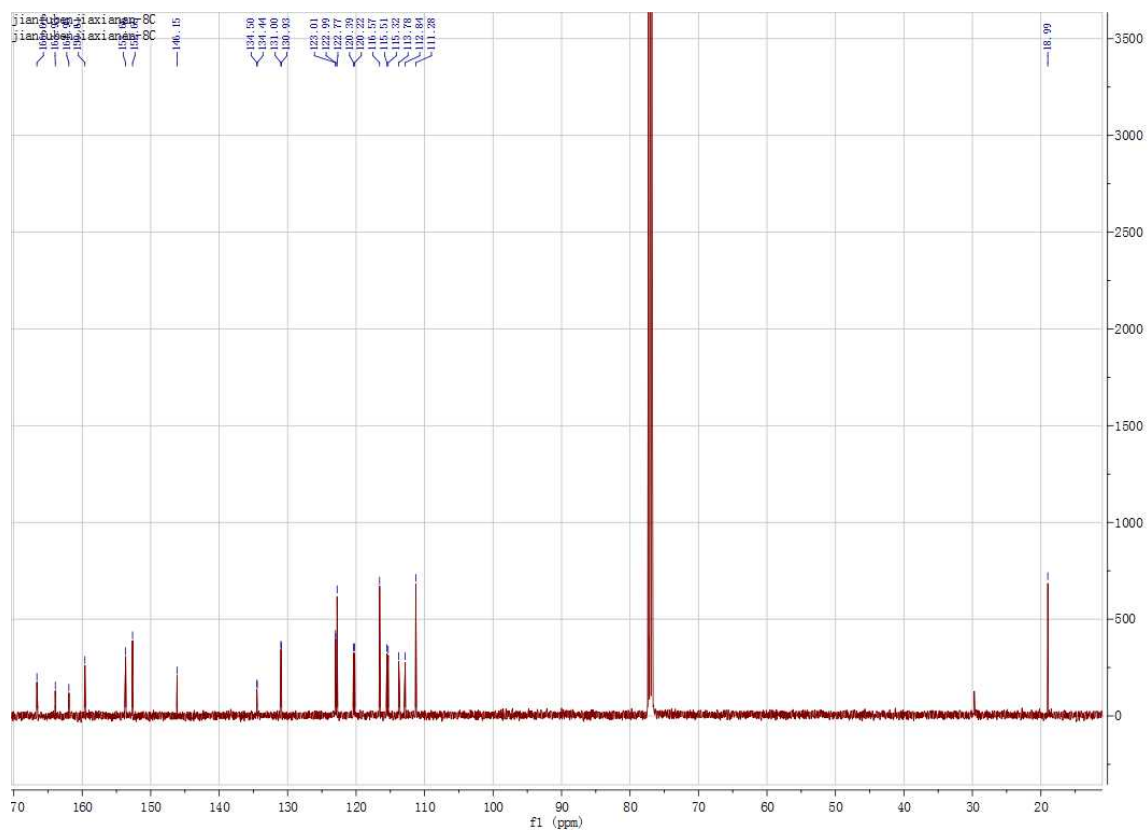

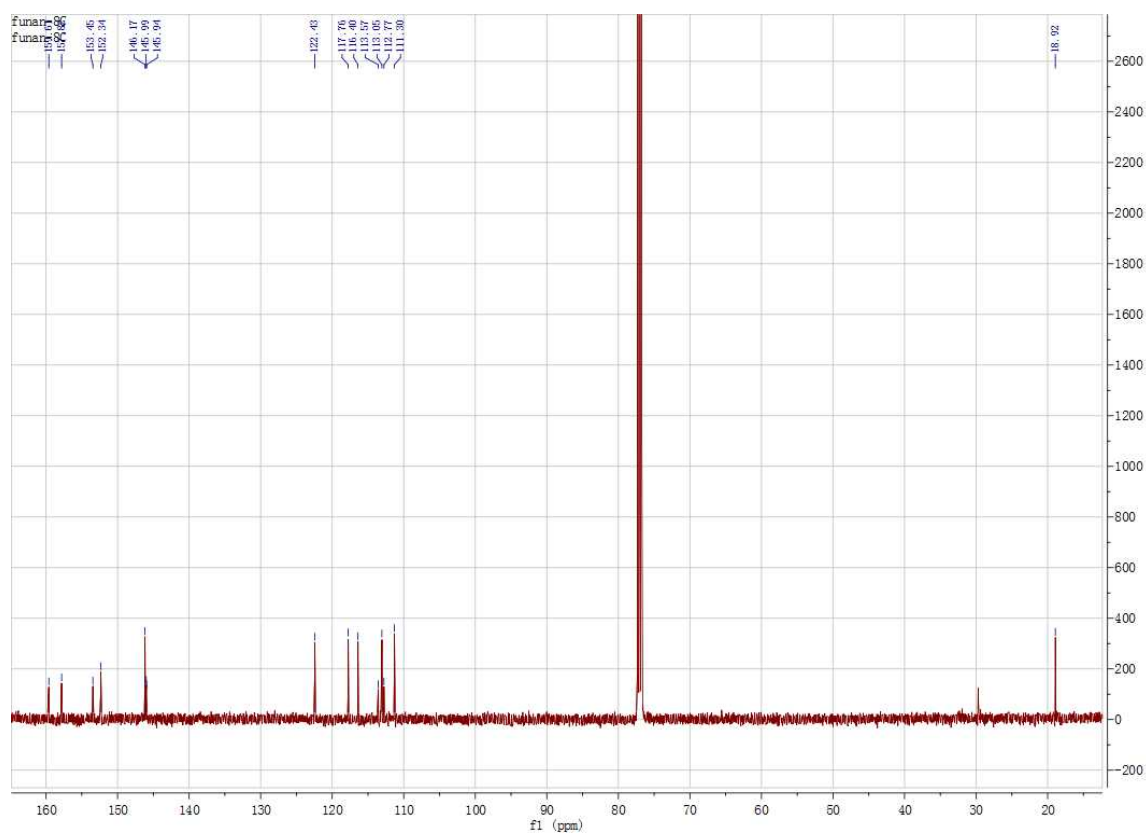

Figure S48. <sup>13</sup>C NMR of 4bo

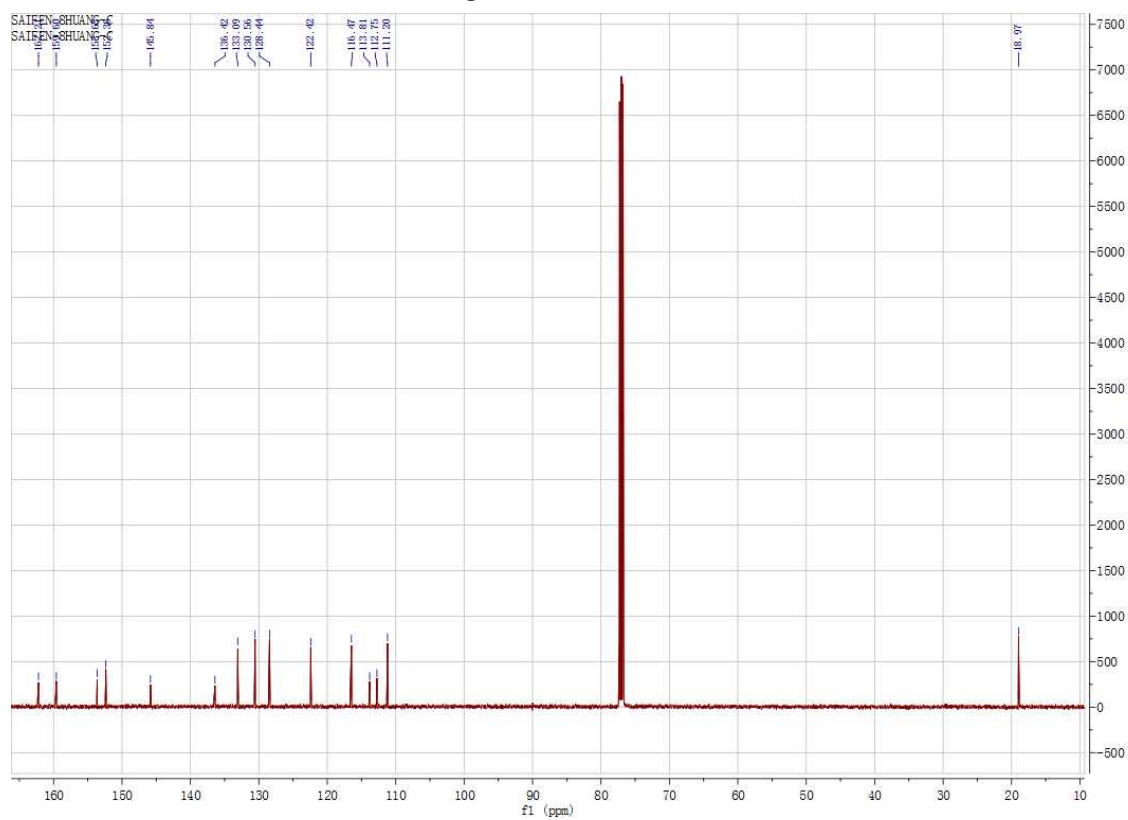

Figure S49. <sup>13</sup>C NMR of 4bp

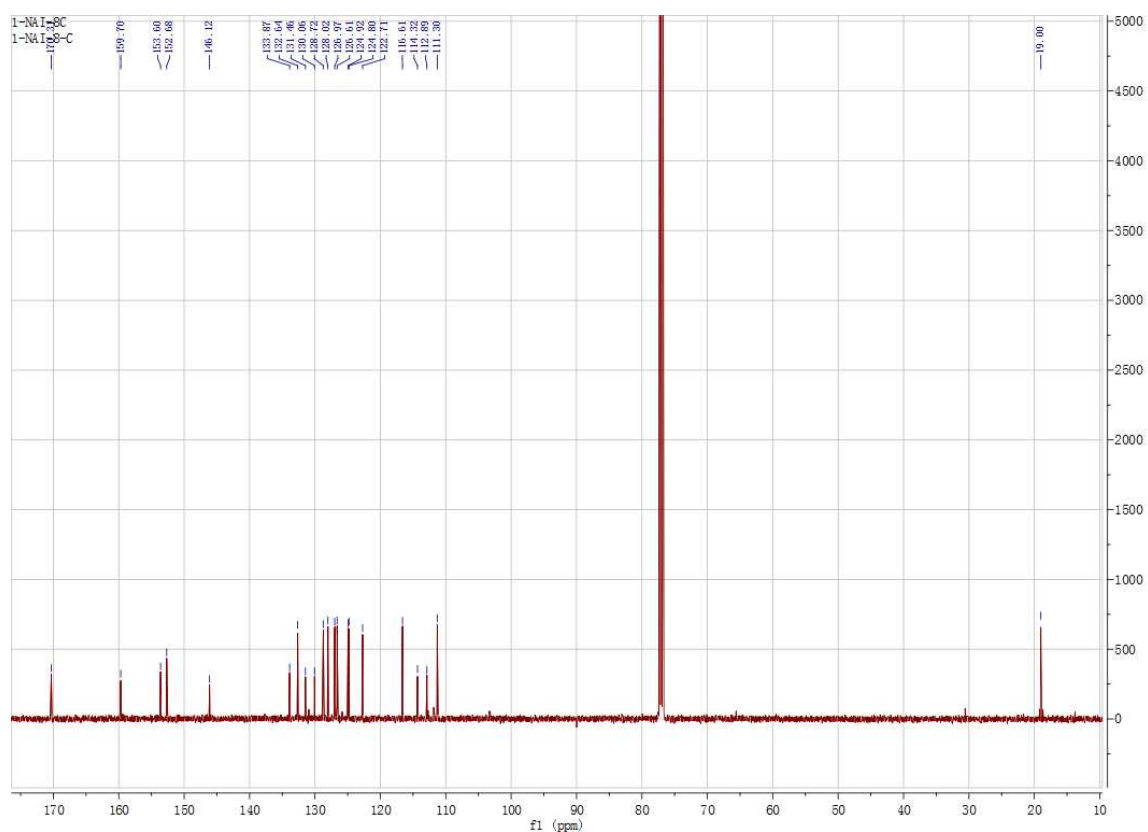

Figure S50.  $^{13}\text{C}$  NMR of 4bq
